# Supplementary material for: Regulation of Hippo/YAP axis in colon cancer progression by the deubiquitinase JOSD1
Source: PubMed Central journal article supplement (PMC11325045; doi:10.1038/s41420-024-02136-7), 2024-08-14
Supplement: 41420_2024_2136_MOESM9_ESM.pdf [file 41420_2024_2136_MOESM9_ESM.pdf]

Figure 1A

|         |         |
|---------|---------|
| USP29   | 0.943   |
| UCHL1   | 0.866   |
| USP17L2 | 0.776   |
| USP18   | 0.736   |
| UBTD1   | 0.646   |
| USP13   | 0.575   |
| USP44   | 0.567   |
| USP51   | 0.536   |
| USP32   | 0.46345 |
| JOSD1   | 0.367   |

**Figure 2A**

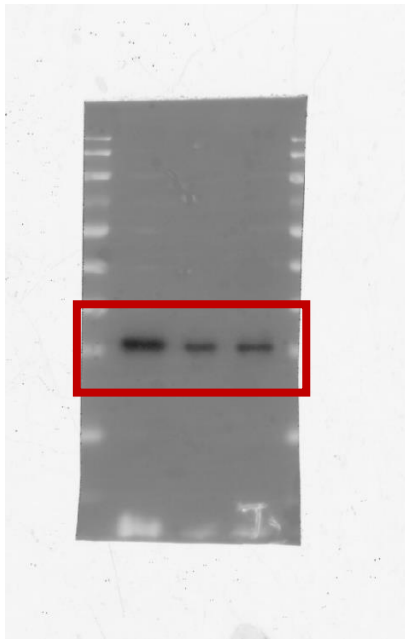

JOSD1

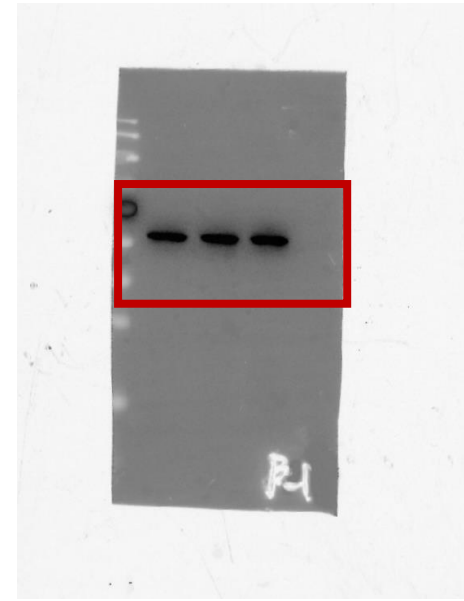

$\beta$ -actin

**Figure 2B**

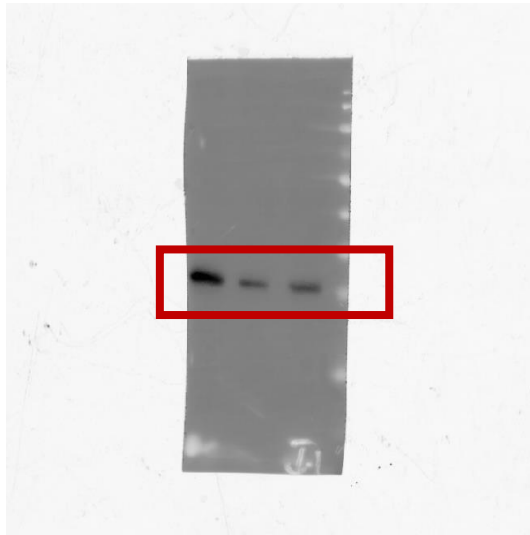

JOSD1

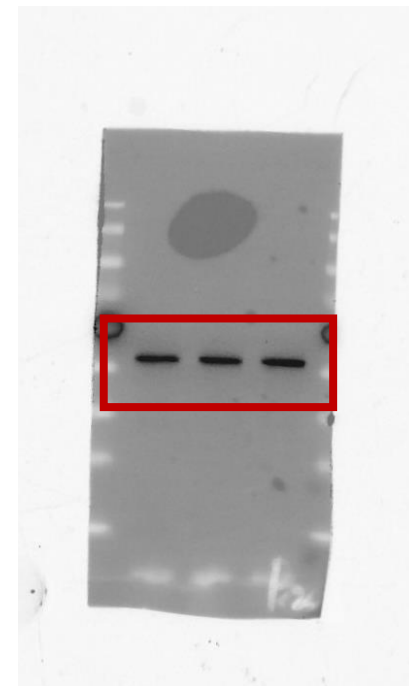

$\beta$ -actin

**Figure 2C**

| siControl | siJOSD1#1 | siJOSD1#2 |
|-----------|-----------|-----------|
| 0.930825  | 0.550982  | 0.221481  |
| 0.954011  | 0.449079  | 0.170904  |
| 1.115165  | 0.366023  | 0.187439  |

**Figure 2D**

| siControl | siJOSD1#1 | siJOSD1#2 |
|-----------|-----------|-----------|
| 1.11248   | 0.112579  | 0.182769  |
| 0.99423   | 0.09233   | 0.132183  |
| 0.89329   | 0.056911  | 0.161566  |

**Figure 2E**

| Time (h) | siControl |          |          | siJOSD1#1 |          |          | siJOSD1#2 |          |          |
|----------|-----------|----------|----------|-----------|----------|----------|-----------|----------|----------|
| 0        | 1.016686  | 0.97012  | 1.013194 | 1.035962  | 1.023702 | 0.9481   | 1.010373  | 0.977178 | 1.012449 |
| 24       | 2.456345  | 2.467986 | 2.516492 | 1.295464  | 1.326114 | 1.236208 | 1.53527   | 1.595436 | 1.53112  |
| 48       | 4.136593  | 4.142414 | 4.167637 | 1.873723  | 1.892113 | 1.765427 | 2.072614  | 2.458506 | 2.377593 |
| 72       | 6.53279   | 6.395033 | 6.505627 | 4.092767  | 4.062117 | 4.017164 | 4.209544  | 4.074689 | 4.180498 |

**Figure 2F**

| Time(h) | siControl |          |          | siJOSD1#1 |          |          | siJOSD1#2 |          |          |
|---------|-----------|----------|----------|-----------|----------|----------|-----------|----------|----------|
| 0       | 1.027998  | 0.98412  | 0.987882 | 0.978134  | 1.030847 | 0.991019 | 0.990484  | 0.992647 | 1.016869 |
| 24      | 2.513581  | 2.55328  | 2.584622 | 1.14018   | 1.233893 | 1.105037 | 1.541955  | 1.550606 | 1.589533 |
| 48      | 4.534058  | 4.56122  | 4.607188 | 2.284264  | 2.301835 | 2.313549 | 2.737889  | 2.921713 | 2.884948 |
| 72      | 7.124948  | 7.139574 | 7.246135 | 3.592347  | 3.664584 | 3.799297 | 4.273356  | 4.437716 | 4.262543 |

**Figure 2H**

| siControl | siJOSD1#1 | siJOSD1#2 |
|-----------|-----------|-----------|
| 0.928688  | 0.376411  | 0.248033  |
| 1.106504  | 0.406185  | 0.173655  |
| 0.964808  | 0.309264  | 0.143943  |

**Figure 2J**

| siControl  | siJOSD1#1    | siJOSD1#2   |
|------------|--------------|-------------|
| 0.97745245 | 0.3152376458 | 0.28346826  |
| 0.96246934 | 0.2724767459 | 0.196312759 |
| 1.06007821 | 0.2462809113 | 0.153363    |

**Figure 2L**

| siControl  | siJOSD1#1      | siJOSD1#2  |
|------------|----------------|------------|
| 1.03436543 | 0.2756377075   | 0.1678825  |
| 0.861477   | 0.29352334787  | 0.19664734 |
| 1.10415757 | 0.267534287987 | 0.1647024  |

**Figure 2N**

| siControl  | siJOSD1#1 | siJOSD1#2     |
|------------|-----------|---------------|
| 0.95823746 | 0.25326   | 0.24731469429 |
| 1.11383574 | 0.231819  | 0.2034778     |
| 0.9279268  | 0.241505  | 0.1741274519  |

**Figure 2P**

| siControl | siJOSD1#1 | siJOSD1#2 |
|-----------|-----------|-----------|
| 3.84      | 9.84      | 10.97     |
| 3.59      | 11.03     | 10.76     |
| 4         | 11.14     | 10.18     |

**Figure 2R**

| siControl | siJOSD1#1 | siJOSD1#2 |
|-----------|-----------|-----------|
| 9.69      | 15.19     | 14.53     |
| 9.96      | 16.63     | 15.01     |
| 9.73      | 16.48     | 13.96     |

**Figure 2T**

| Time(h) | siControl |      |      | siJOSD1#1 |      |      | siJOSD1#2 |      |      |
|---------|-----------|------|------|-----------|------|------|-----------|------|------|
| 0       | 0         | 0    | 0    | 0         | 0    | 0    | 0         | 0    | 0    |
| 24      | 0.77      | 0.78 | 0.68 | 0.45      | 0.49 | 0.43 | 0.42      | 0.43 | 0.46 |
| 48      | 0.97      | 0.94 | 0.98 | 0.75      | 0.7  | 0.78 | 0.67      | 0.69 | 0.58 |

**Figure 2V**

| Time(h) | siControl |      |      | siJOSD1#1 |      |      | siJOSD1#2 |      |      |
|---------|-----------|------|------|-----------|------|------|-----------|------|------|
| 0       | 0         | 0    | 0    | 0         | 0    | 0    | 0         | 0    | 0    |
| 24      | 0.70      | 0.79 | 0.64 | 0.62      | 0.57 | 0.52 | 0.32      | 0.37 | 0.42 |
| 48      | 0.94      | 1    | 0.97 | 0.79      | 0.75 | 0.82 | 0.59      | 0.53 | 0.49 |



**Figure 2X**

| Time (Day) | shControl |      |       |      |       | shJOSD1 |       |       |       |       |
|------------|-----------|------|-------|------|-------|---------|-------|-------|-------|-------|
| 0          | 0         | 0    | 0     | 0    | 0     | 0       | 0     | 0     | 0     | 0     |
| 7          | 67        | 86.7 | 77    | 28   | 15    | 16.19   | 19.28 | 25    | 24    | 27.5  |
| 14         | 195       | 143  | 145   | 47.2 | 49    | 27.51   | 29.14 | 32.4  | 32.98 | 31.72 |
| 21         | 278       | 384  | 464.3 | 204  | 285   | 104.02  | 88.11 | 94.29 | 64.23 | 56.05 |
| 28         | 734.6     | 977  | 484   | 269  | 474.6 | 207.5   | 114.6 | 103   | 75.4  | 69    |
| 35         | 850       | 1152 | 500   | 416  | 600   | 294     | 171.5 | 196   | 87.5  | 75    |

**Figure 2Y**

| shControl | shJOSD1  |
|-----------|----------|
| 0.949598  | 0.328449 |
| 1.286984  | 0.191595 |
| 0.558587  | 0.218966 |
| 0.464744  | 0.097753 |
| 0.670304  | 0.083788 |

**Figure 2Z**

| shControl | shJOSD1 |
|-----------|---------|
| 189       | 14      |
| 80        | 21      |
| 86        | 27      |
| 163       | 31      |
| 107       | 11      |

**Figure 3A**

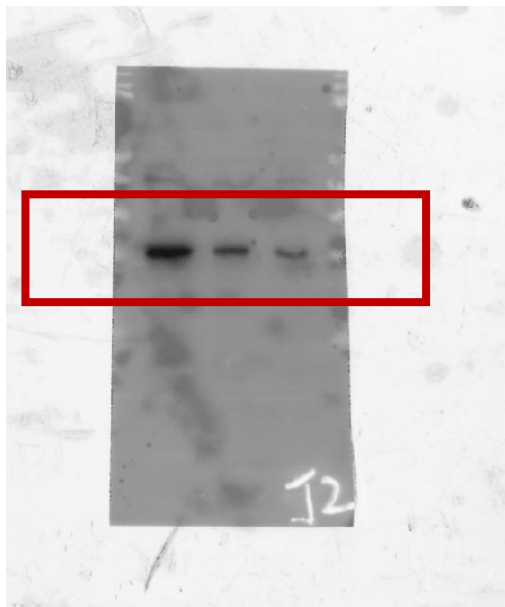

**JOSD1**

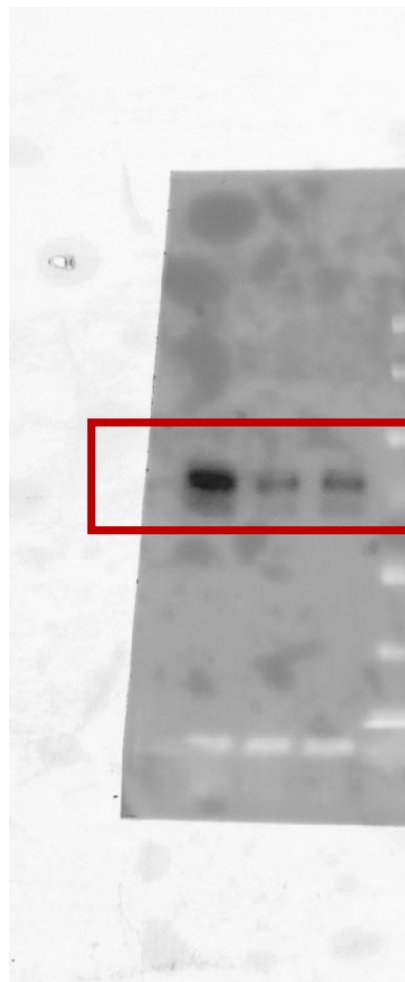

**YAP**

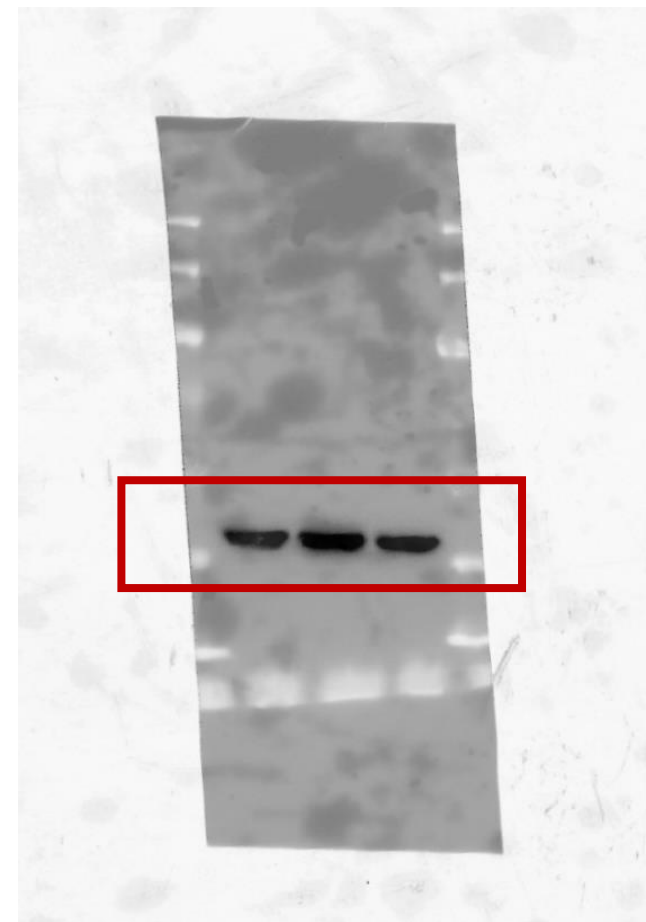

**$\beta$ -actin**

**Figure 3B**

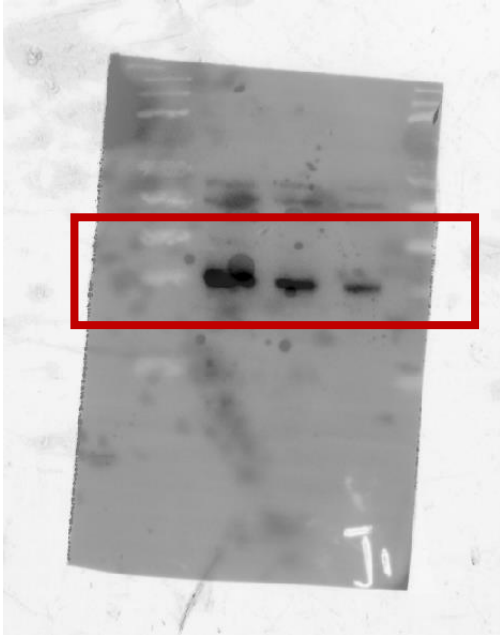

**JOSD1**

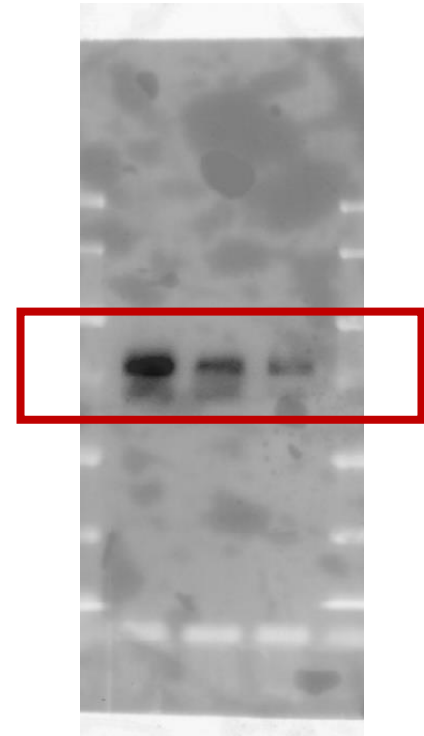

**YAP**

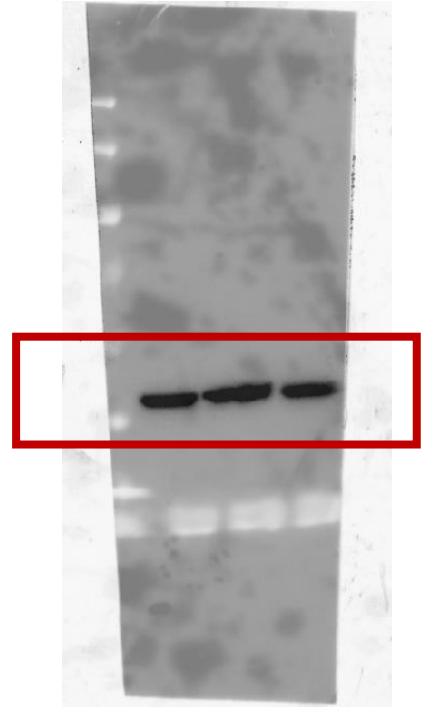

**$\beta$ -actin**

**Figure 3C**

| siControl | siJOSD1#1 | siJOSD1#2 |
|-----------|-----------|-----------|
| 1.14615   | 0.952847  | 0.731617  |
| 0.961876  | 0.96934   | 0.728385  |
| 0.891974  | 0.707341  | 0.915305  |

**Figure 3D**

| siControl | siJOSD1#1 | siJOSD1#2 |
|-----------|-----------|-----------|
| 0.938635  | 0.843534  | 0.814421  |
| 0.946641  | 0.873132  | 1.046778  |
| 1.114723  | 1.005973  | 1.05593   |

**Figure 3E**

|       | siControl |          |          | siJOSD1#1 |          |          | siJOSD1#2 |          |          |
|-------|-----------|----------|----------|-----------|----------|----------|-----------|----------|----------|
| CYR61 | 1.21701   | 0.892092 | 0.890898 | 0.066526  | 0.069858 | 0.067519 | 0.205334  | 0.233555 | 0.170395 |
| CTGF  | 1.097476  | 0.894214 | 1.008309 | 0.319648  | 0.300488 | 0.352764 | 0.188685  | 0.199236 | 0.180905 |

**Figure 3F**

|       | siControl |          |          | siJOSD1#1 |          |          | siJOSD1#2 |          |          |
|-------|-----------|----------|----------|-----------|----------|----------|-----------|----------|----------|
| CYR61 | 0.931889  | 0.998103 | 1.070008 | 0.265576  | 0.222033 | 0.171719 | 0.202352  | 0.23603  | 0.297536 |
| CTGF  | 1.058692  | 0.90462  | 1.036688 | 0.37399   | 0.417414 | 0.403903 | 0.274708  | 0.280455 | 0.319313 |

**Figure 3G**

| siControl | siJOSD1#1 | siJOSD1#2 |
|-----------|-----------|-----------|
| 1.094327  | 0.34631   | 0.228198  |
| 1.018019  | 0.373704  | 0.159769  |
| 0.887654  | 0.284533  | 0.132432  |

**Figure 3H**

| siControl | siJOSD1#1 | siJOSD1#2 |
|-----------|-----------|-----------|
| 1.170716  | 0.286072  | 0.187722  |
| 0.886151  | 0.263296  | 0.177611  |
| 0.947134  | 0.274684  | 0.140242  |

**Figure 3K**

|       | Flag     |          |          | Flag-JOSD1 |          |          | Flag-JOSD1 <sup>C36A</sup> |          |          |
|-------|----------|----------|----------|------------|----------|----------|----------------------------|----------|----------|
| CYR61 | 1.073635 | 0.925421 | 1.000944 | 2.257088   | 2.383053 | 2.309433 | 0.722671                   | 0.812349 | 0.788852 |
| CTGF  | 0.952145 | 1.034061 | 1.013794 | 1.810792   | 2.433573 | 2.245578 | 0.847187                   | 0.964107 | 0.903758 |

**Figure 3L**

| Flag     | Flag-JOSD1 | Flag-JOSD1 <sup>C36A</sup> |
|----------|------------|----------------------------|
| 1.027134 | 3.096746   | 0.983316                   |
| 1.102609 | 3.174195   | 0.896298                   |
| 0.870257 | 3.19187    | 0.938527                   |

**Figure 3J**

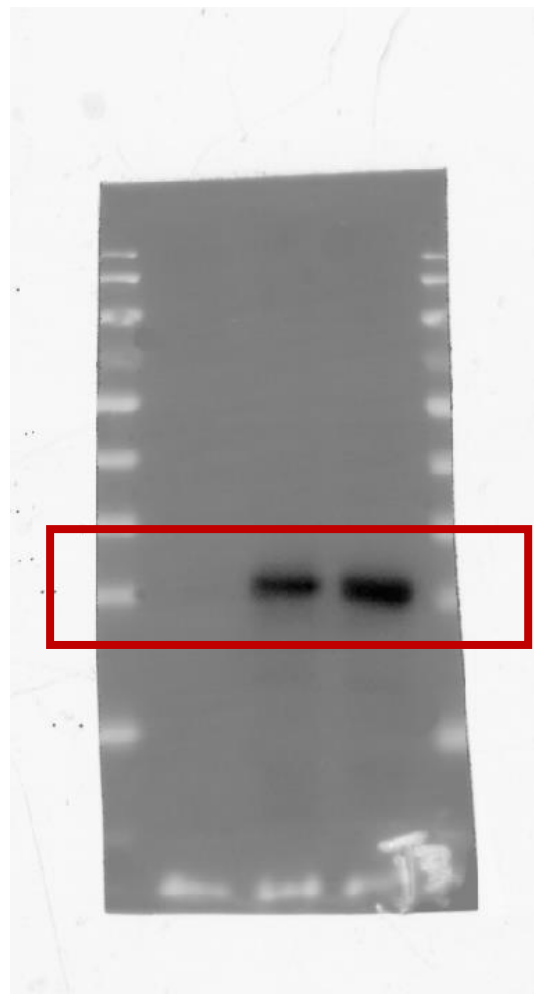

**FLAG**

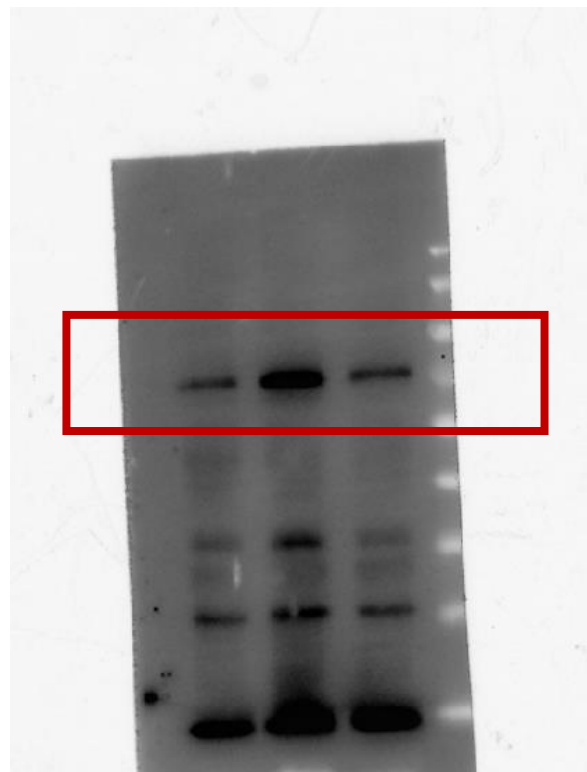

**YAP**

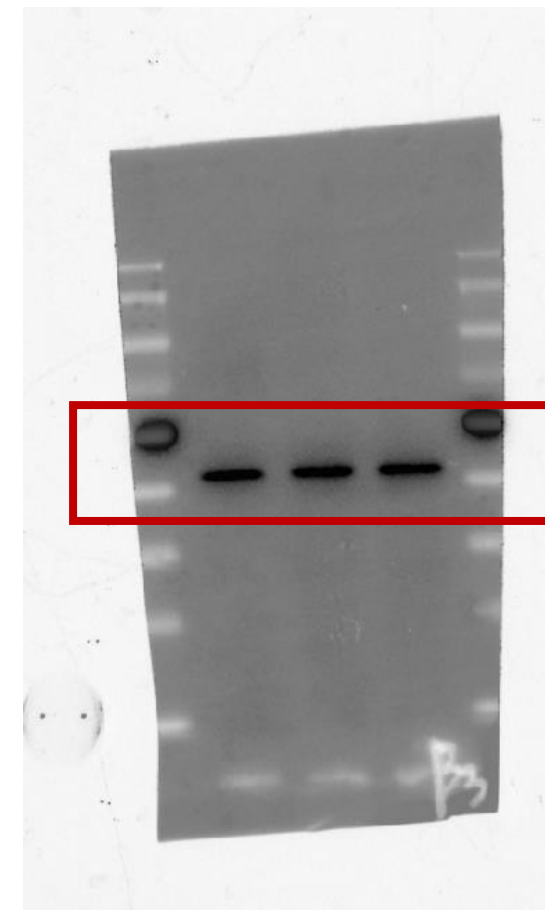

**β-actin**



**Figure 4A**

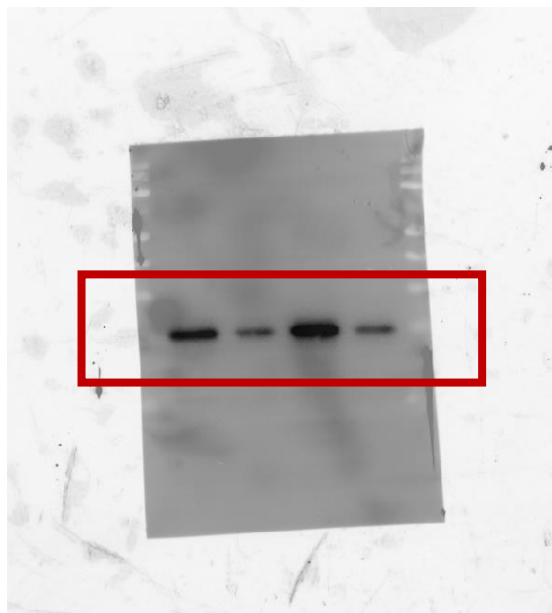

**JOSD1**

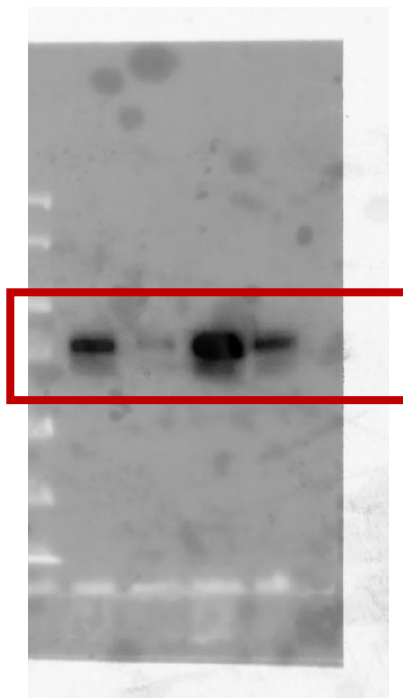

**YAP**

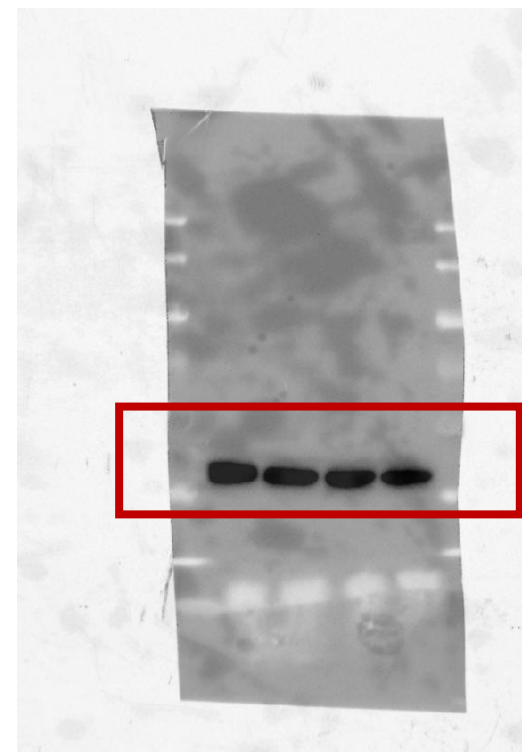

**$\beta$ -actin**

**Figure 4B**

|       | siControl    |              |              | siJOSD1#1    |              |              | YAP          |              |              | siJOSD1+YAP  |              |              |
|-------|--------------|--------------|--------------|--------------|--------------|--------------|--------------|--------------|--------------|--------------|--------------|--------------|
| CYR61 | 1.13064<br>5 | 1.07740<br>7 | 0.79194<br>8 | 0.25572<br>5 | 0.26719<br>3 | 0.29922<br>7 | 3.39733<br>9 | 4.22263<br>3 | 3.68698<br>4 | 1.24570<br>8 | 1.25351<br>2 | 0.99949<br>6 |
| CTGF  | 0.93462<br>5 | 0.98446<br>2 | 1.08091<br>3 | 0.35927<br>8 | 0.33605<br>8 | 0.25836<br>6 | 3.04369<br>3 | 3.38389<br>2 | 4.35920<br>5 | 1.35731<br>7 | 1.16919<br>8 | 1.33505<br>2 |

**Figure 4C**

| siControl | siJOSD1  | YAP      | siJOSD1+YAP |
|-----------|----------|----------|-------------|
| 0.929907  | 0.382758 | 2.715274 | 0.960547    |
| 1.104649  | 0.402498 | 2.730592 | 0.83267     |
| 0.965444  | 0.365535 | 2.680646 | 1.202045    |

**Figure 4D**

| Time(h) | siControl |          |          | siJOSD1  |          |          | YAP      |          |          | siJOSD1+YAP |          |          |
|---------|-----------|----------|----------|----------|----------|----------|----------|----------|----------|-------------|----------|----------|
| 0       | 1.027246  | 1.045655 | 0.927099 | 0.892193 | 0.981413 | 1.003717 | 0.971119 | 0.978339 | 1.036101 | 1.087581    | 0.897344 | 0.933238 |
| 24      | 3.177467  | 3.177467 | 3.151694 | 2.501795 | 2.096195 | 2.157215 | 5.620939 | 5.862816 | 5.837545 | 3.037175    | 3        | 2.959108 |
| 48      | 6.215613  | 6.219331 | 6.159851 | 3.132807 | 3.139986 | 3.251256 | 9.375451 | 9.364621 | 9.534296 | 5.854197    | 5.83947  | 5.828424 |
| 72      | 9.02974   | 9.36803  | 9.379182 | 4.835607 | 4.853553 | 4.47308  | 14.6787  | 15.01805 | 14.63538 | 8.468336    | 8.173785 | 8.379971 |

**Figure 4F**

| siControl | siJOSD1     | YAP       | siJOSD1+YAP |
|-----------|-------------|-----------|-------------|
| 0.828688  | 0.368236487 | 2.7736814 | 0.959877476 |
| 1.206504  | 0.43746782  | 2.778487  | 0.77982746  |
| 0.964808  | 0.384692    | 2.6823794 | 1.17874     |

**Figure 4H**

| Time(h) | siControl |         |         | siJOSD1 |          |         | YAP     |         |         | siJOSD1+YAP |         |         |
|---------|-----------|---------|---------|---------|----------|---------|---------|---------|---------|-------------|---------|---------|
| 0       | 0         | 0       | 0       | 0       | 0        | 0       | 0       | 0       | 0       | 0           | 0       | 0       |
| 24      | 0.40458   | 0.43587 | 0.38167 | 0.14444 | 0.211111 | 0.26666 | 0.85416 | 0.58333 | 0.66666 | 0.42975     | 0.47933 | 0.35537 |
| 48      | 0.68885   | 0.66938 | 0.67809 | 0.33333 | 0.45555  | 0.3     | 0.95833 | 0.96166 | 0.98416 | 0.74809     | 0.72727 | 0.72479 |

**Figure 4J**

| siControl | siJOSD1  | YAP      | siJOSD1+YAP |
|-----------|----------|----------|-------------|
| 1.012658  | 0.253165 | 3.594937 | 0.977215    |
| 0.924051  | 0.341772 | 3.658228 | 0.983797    |
| 1.063291  | 0.329114 | 3.468354 | 1.009241    |

**Figure 4L**

| siControl | siJOSD1 | YAP  | siJOSD1+YAP |
|-----------|---------|------|-------------|
| 7.77      | 13.78   | 3.74 | 8.94        |
| 7.83      | 13.07   | 3.28 | 8.07        |
| 7.03      | 12.6    | 3.95 | 8.46        |

**Figure 4N**

| Time (Day) | shControl |           |     |     |     | shJOSD1 |           |      |     |           | YAP  |            |      |     |            | shJOSD1+YAP |     |     |     |     |
|------------|-----------|-----------|-----|-----|-----|---------|-----------|------|-----|-----------|------|------------|------|-----|------------|-------------|-----|-----|-----|-----|
| 0          | 0         | 0         | 0   | 0   | 0   | 0       | 0         | 0    | 0   | 0         | 0    | 0          | 0    | 0   | 0          | 0           | 0   | 0   | 0   | 0   |
| 7          | 18        | 32        | 8   | 5   | 6   | 7       | 5         | 8    | 2   | 4         | 73   | 77         | 93   | 100 | 98         | 20          | 7   | 5   | 4   | 6   |
| 14         | 53        | 155       | 46  | 39  | 184 | 15      | 18        | 24   | 22  | 16        | 185  | 554        | 170  | 263 | 295        | 43          | 34  | 37  | 40  | 42  |
| 21         | 275       | 287       | 154 | 135 | 299 | 31      | 34        | 40   | 38  | 32        | 586  | 858        | 690  | 730 | 503        | 74          | 163 | 196 | 274 | 95  |
| 28         | 548       | 479       | 327 | 276 | 404 | 174     | 137       | 59   | 156 | 138       | 806  | 1257       | 973  | 838 | 790        | 285         | 429 | 274 | 385 | 394 |
| 35         | 772       | 769.<br>6 | 480 | 384 | 567 | 245     | 269.<br>5 | 87.5 | 245 | 171.<br>5 | 1296 | 1605<br>.5 | 1183 | 950 | 1149<br>.5 | 352         | 517 | 392 | 416 | 470 |

**Figure 4O**

| shControl | shJOSD1  | YAP     | shJOSD1+YAP |
|-----------|----------|---------|-------------|
| 0.862179  | 0.273708 | 1.44786 | 0.393245    |
| 0.859807  | 0.301078 | 1.79362 | 0.577216    |
| 0.536243  | 0.097753 | 1.32162 | 0.437932    |
| 0.428995  | 0.273708 | 1.06132 | 0.464744    |
| 0.633438  | 0.191595 | 1.28419 | 0.524653    |

**Figure 4Q**

| shControl | shJOSD1 | YAP | shJOSD1+YAP |
|-----------|---------|-----|-------------|
| 116       | 62      | 284 | 132         |
| 107       | 46      | 288 | 162         |
| 129       | 30      | 278 | 110         |
| 84        | 41      | 204 | 118         |
| 110       | 21      | 326 | 93          |

**Figure 5B**

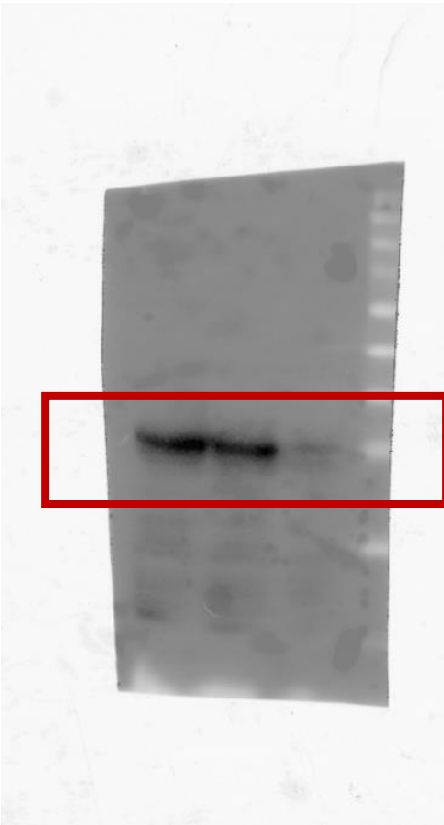

**JOSD1**

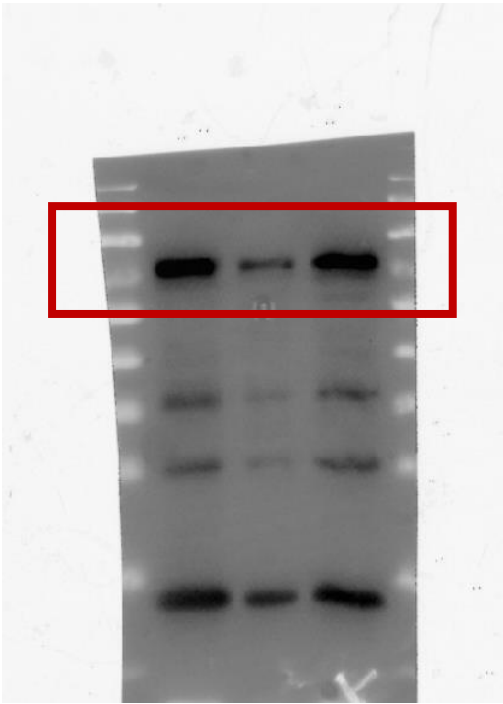

**YAP**

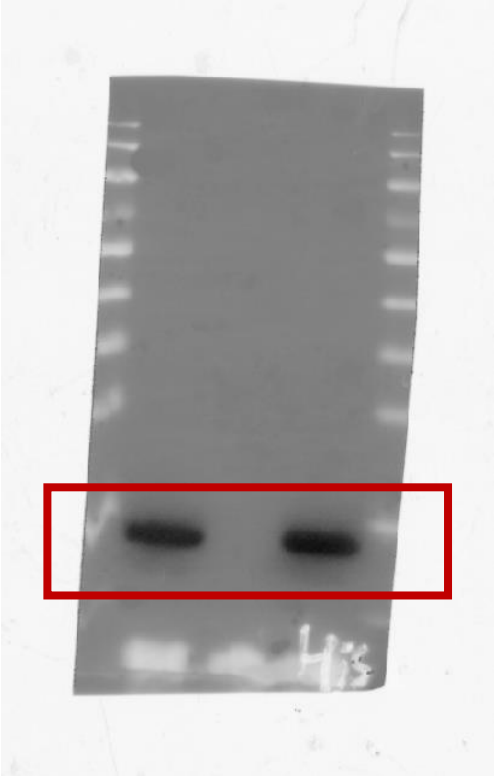

**Histone 3**

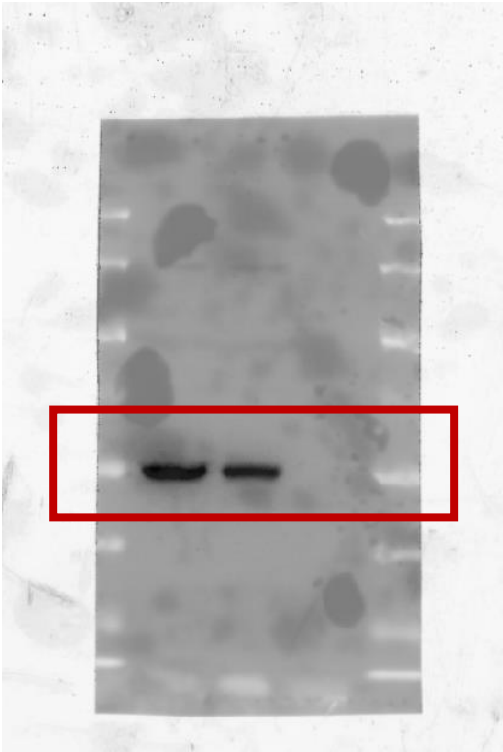

**Tubulin**

**Figure 5C**

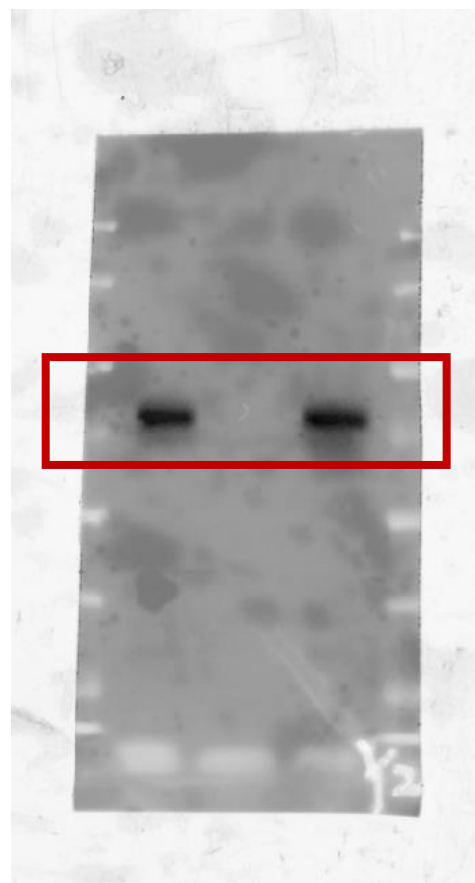

**YAP**

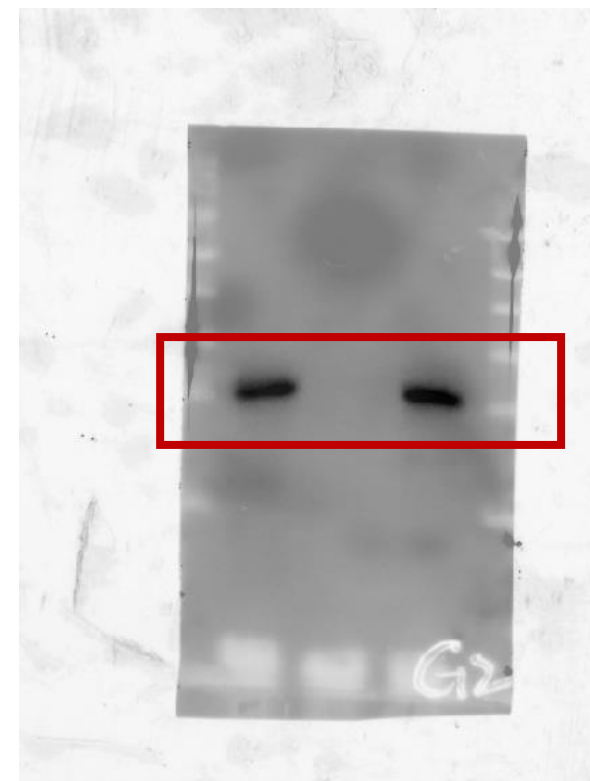

**JOSD1**



Figure 5D

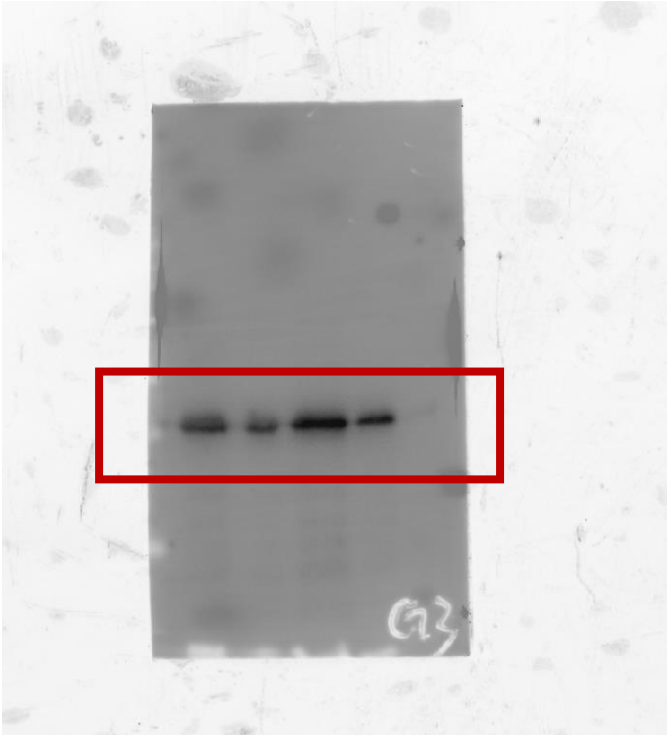

JOSD1

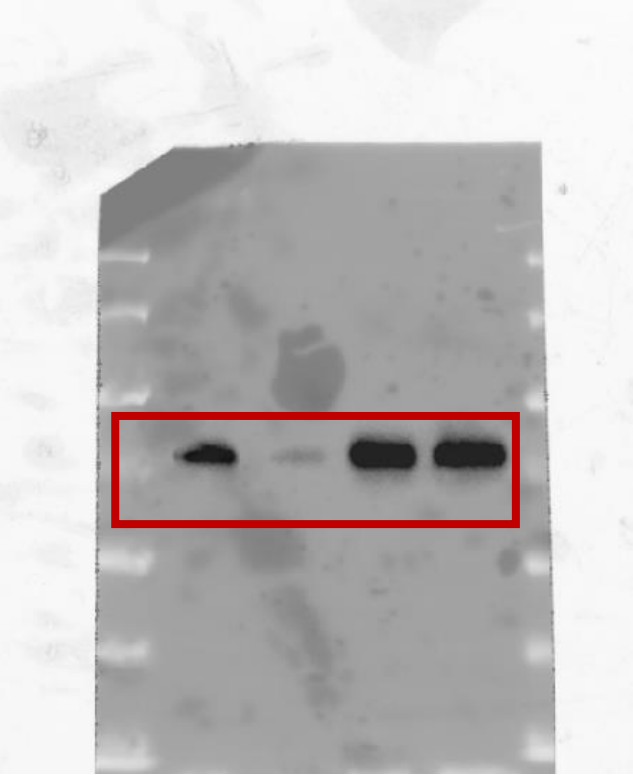

YAP

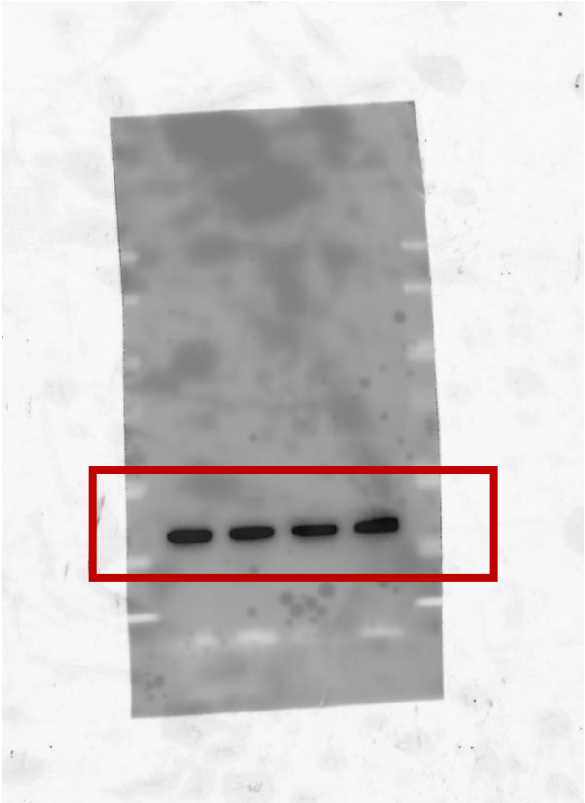

$\beta$ -actin

**Figure 5E**

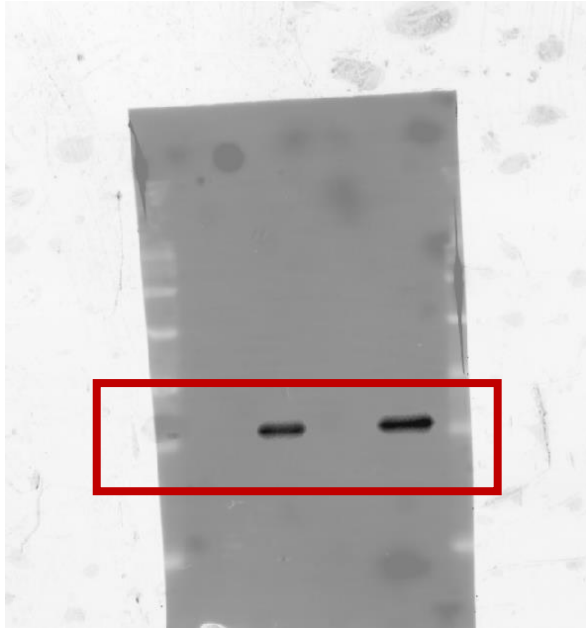

**FLAG**

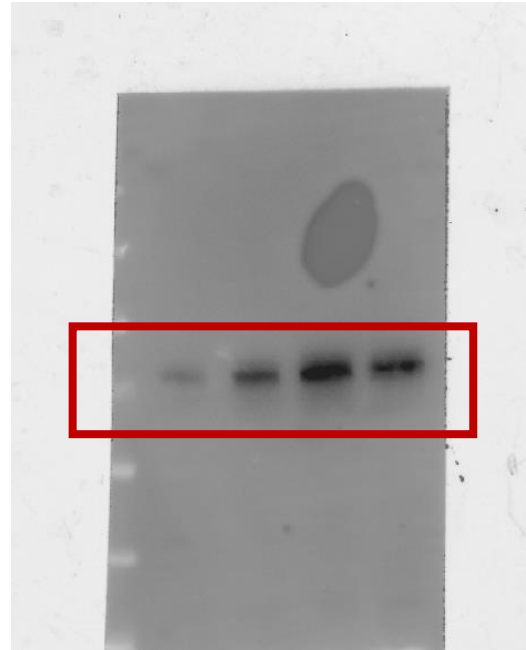

**YAP**

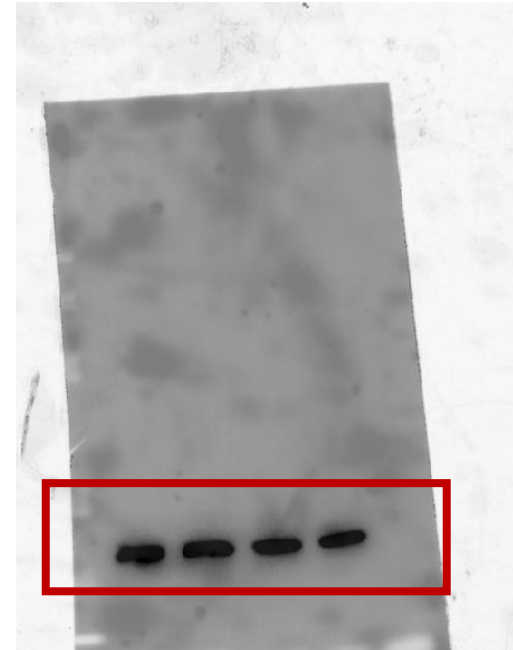

**$\beta$ -actin**

Figure 5F

FLAG

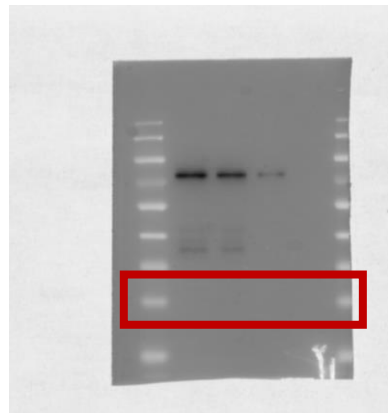

FLAG

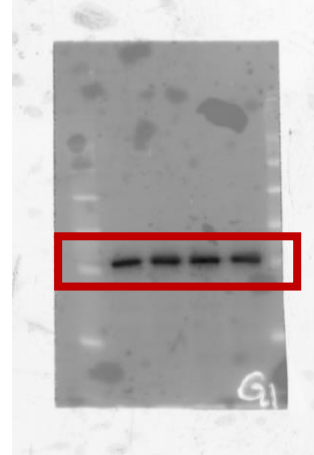

FLAG

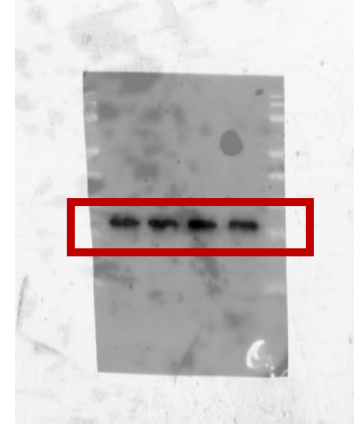

YAP

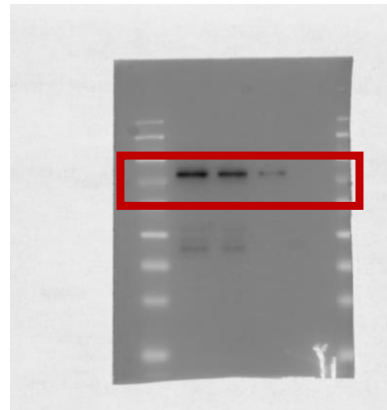

YAP

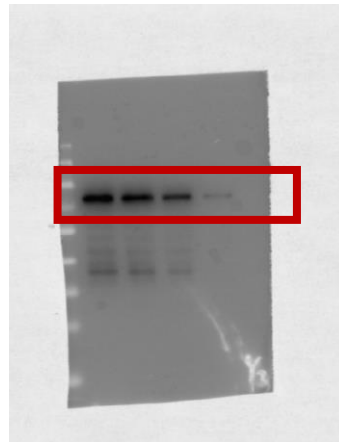

YAP

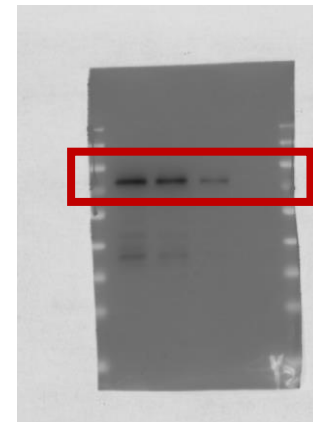

$\beta$ -actin

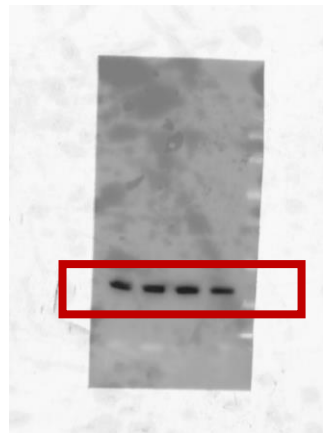

$\beta$ -actin

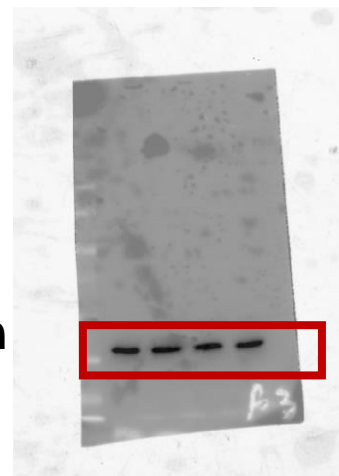

$\beta$ -actin

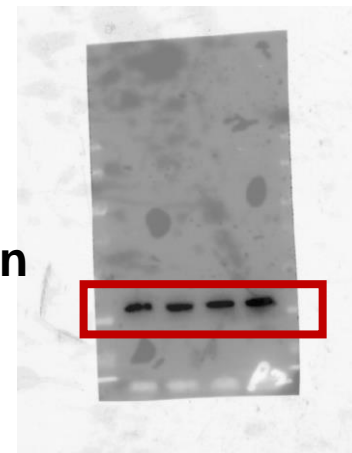

**Figure 5G**

| Time(h) | Flag     |           |                | Flag-JOSD1      |                 |                 | Flag-JOSD1 <sup>C36A</sup> |           |                |
|---------|----------|-----------|----------------|-----------------|-----------------|-----------------|----------------------------|-----------|----------------|
| 0       | 1.001749 | 1.025857  | 0.972394       | 0.9395073<br>18 | 0.9641505<br>07 | 1.0963421<br>76 | 1.004759                   | 1.012325  | 0.982917       |
| 3       | 0.866322 | 0.888336  | 0.738475       | 0.9929490<br>94 | 0.97545         | 0.86856         | 0.746651                   | 0.6857647 | 0.85843        |
| 6       | 0.244219 | 0.1837363 | 0.224467       | 0.6243397<br>79 | 0.6566457       | 0.596436        | 0.160278                   | 0.135537  | 0.223643       |
| 9       | 0.014882 | 0.0186795 | 0.0214754<br>8 | 0.2787293<br>31 | 0.2486585       | 0.308578        | 0.008168                   | 0.0058647 | 0.0097347<br>5 |

**Figure 5I**

| Time(h) | siControl |          |          | siJOSD1  |          |          |
|---------|-----------|----------|----------|----------|----------|----------|
| 0       | 1.002996  | 0.99937  | 0.997633 | 1.337501 | 0.834436 | 0.828063 |
| 3       | 0.875504  | 0.873336 | 0.872435 | 0.443412 | 0.442063 | 0.439364 |
| 6       | 0.534733  | 0.534167 | 0.533023 | 0.059584 | 0.059093 | 0.058073 |
| 9       | 0.137382  | 0.136877 | 0.136063 | 0.003508 | 0.003046 | 0.002714 |

Figure 5H

JOSD1

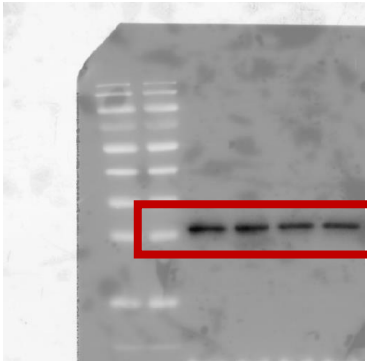

JOSD1

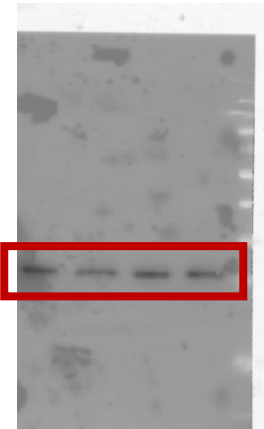

YAP

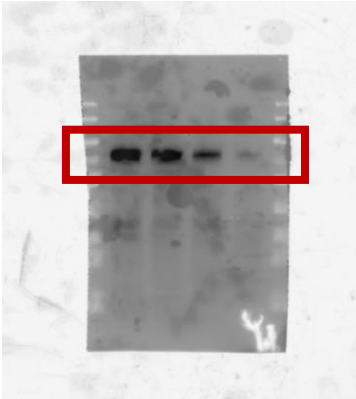

YAP

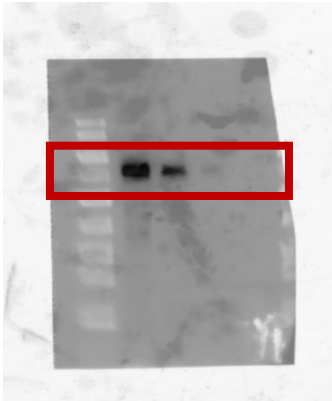

$\beta$ -actin

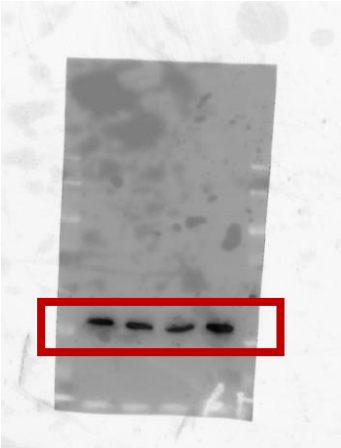

$\beta$ -actin

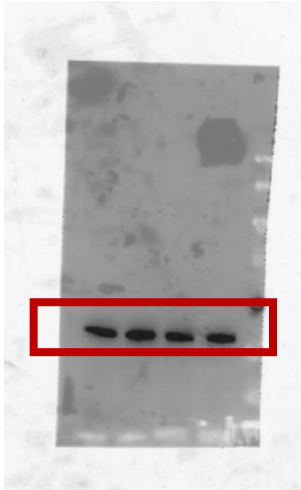

Figure 5L

Myc

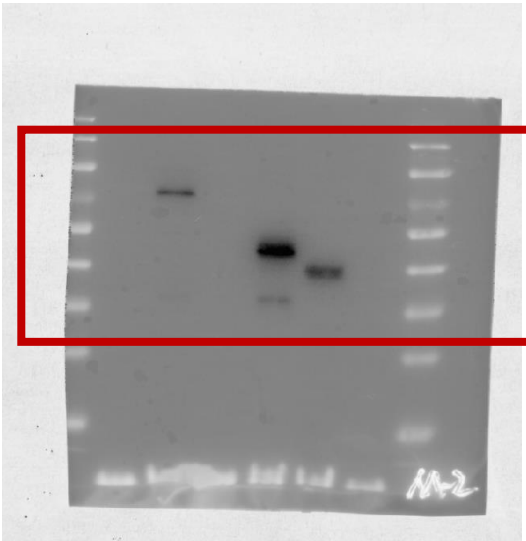

Myc(YAP)

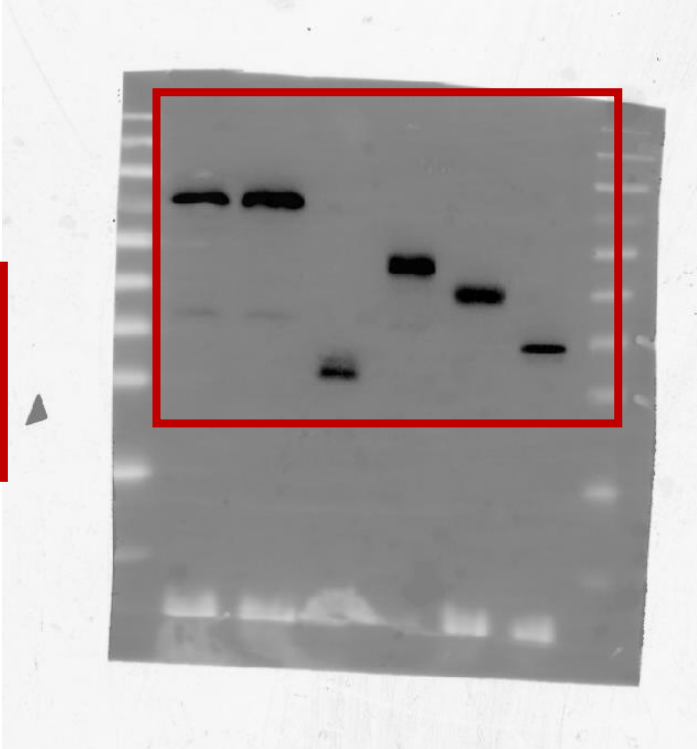

FLAG

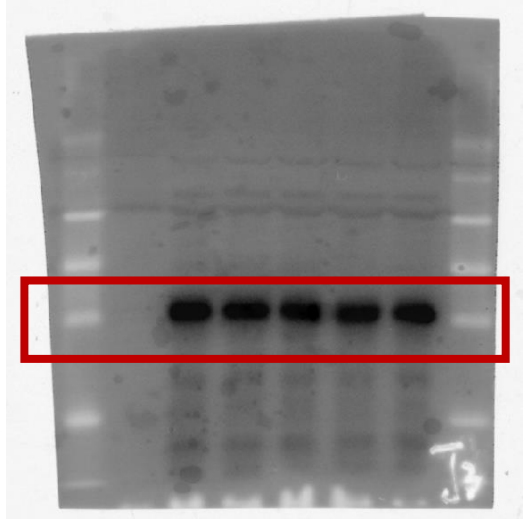

Figure 5M

EGFP

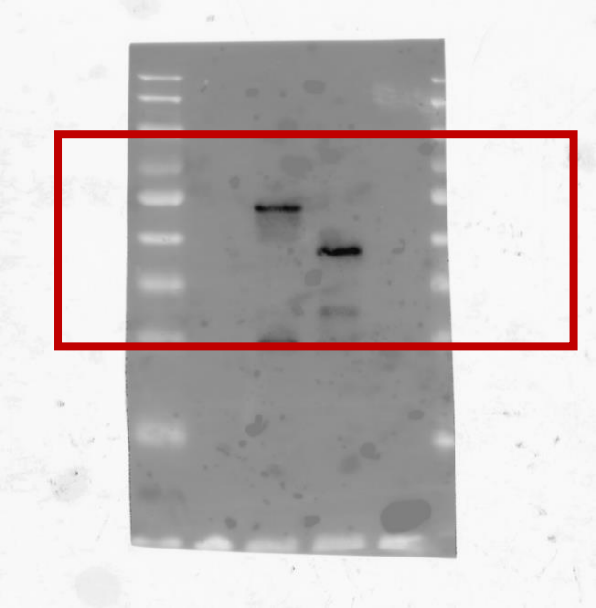

EGFP

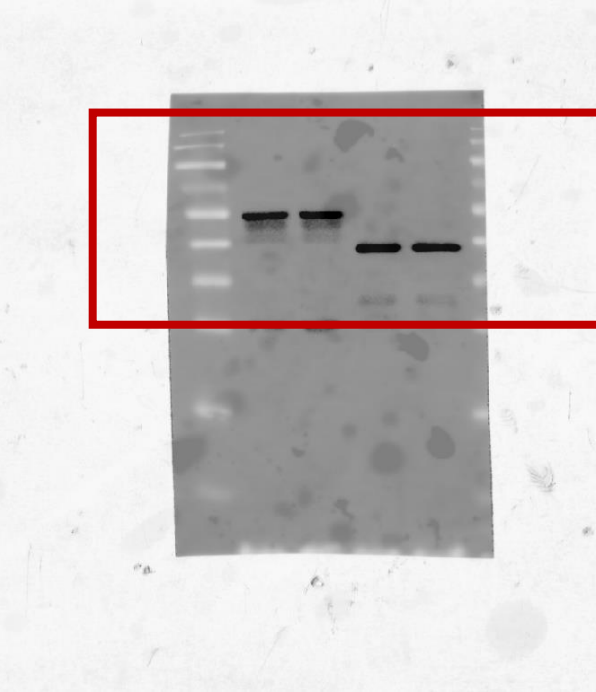

Myc

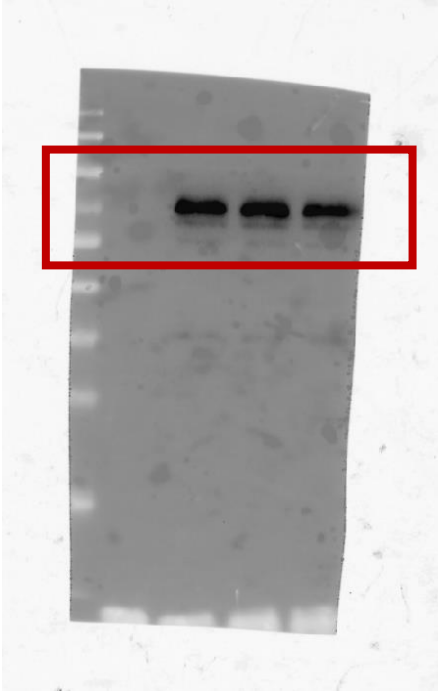

**Figure 6A**

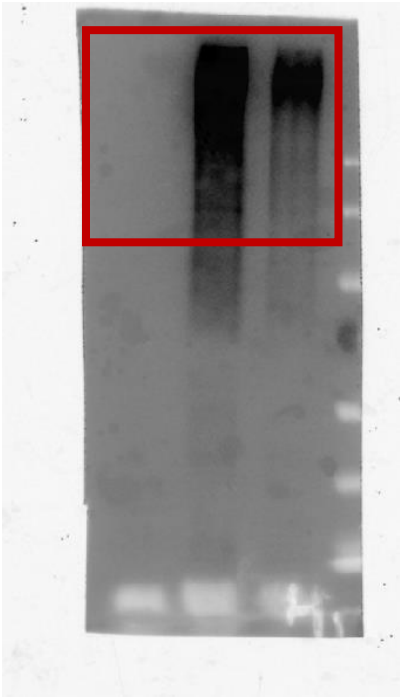

**HA  
(HA-Ub)**

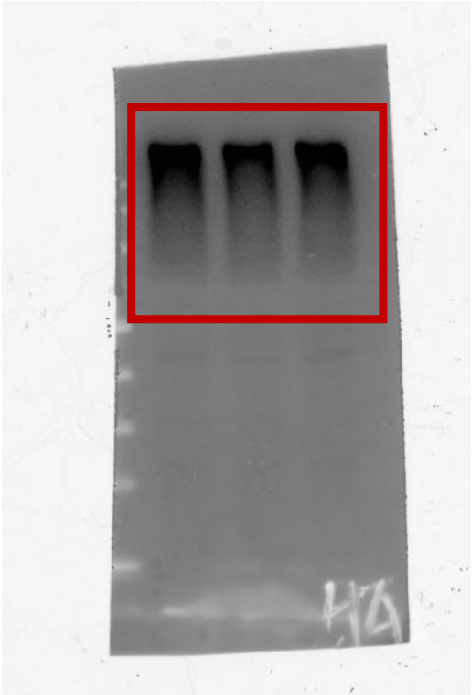

**HA  
(HA-Ub)**

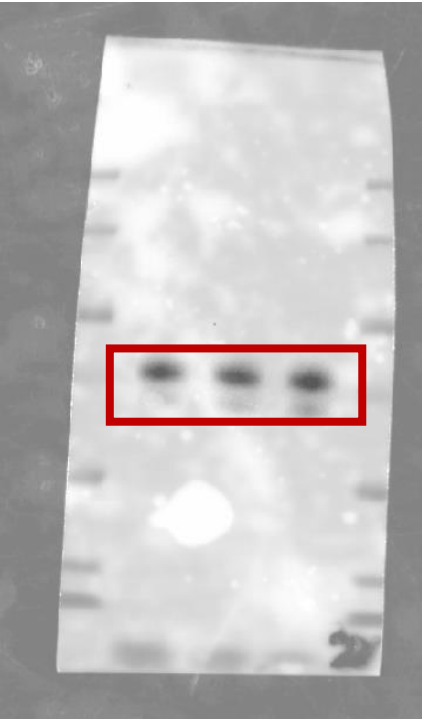

**Flag  
(Flag-YAP)**

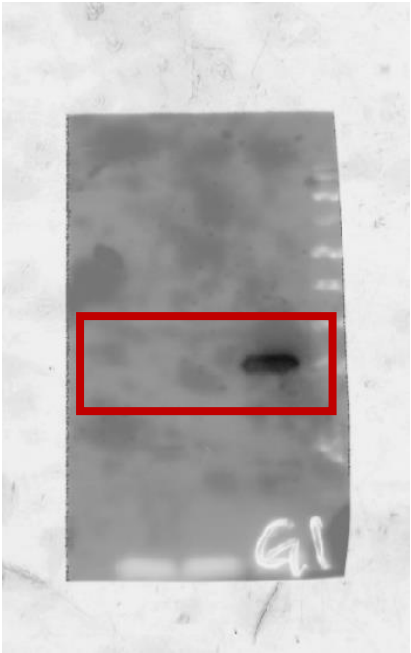

**Myc  
(Myc-JOSD1)**



**Figure 6B**

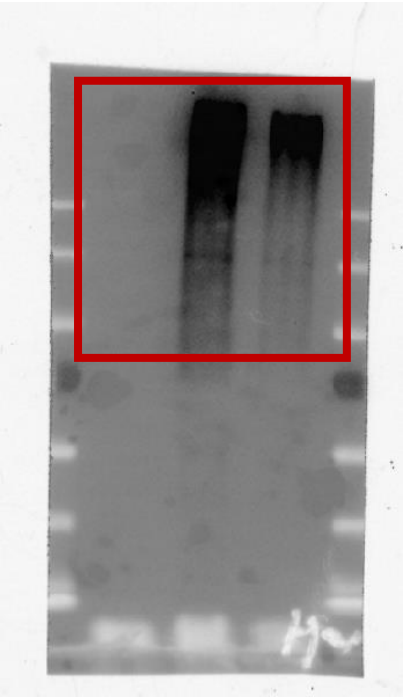

**HA  
(HA-K48-Ub)**

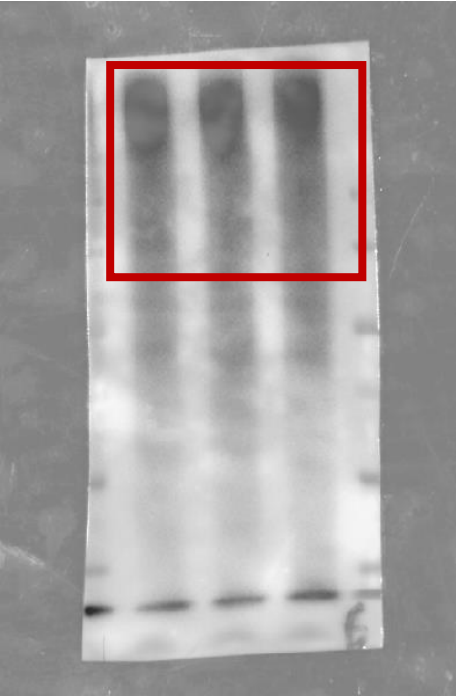

**HA  
(HA-K48-Ub)**

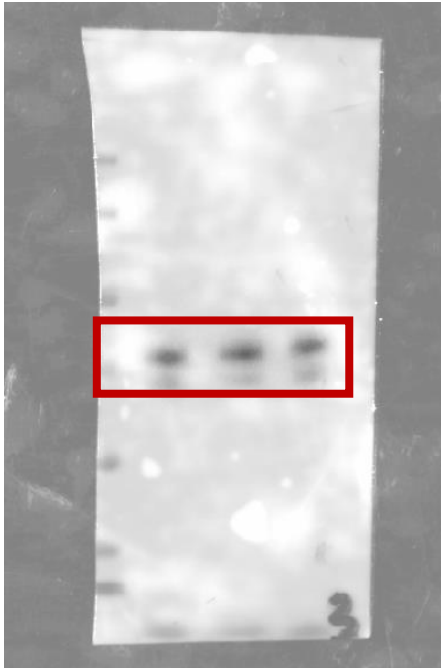

**Flag  
(Flag-YAP)**

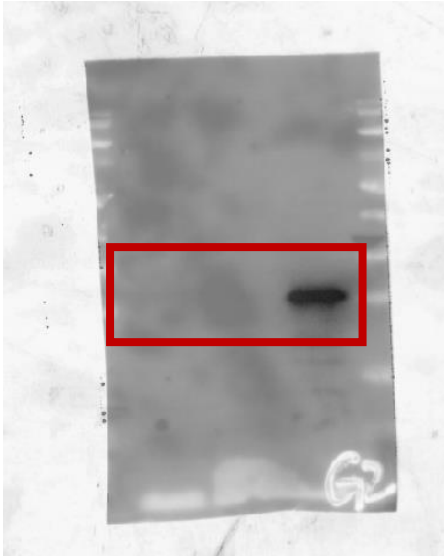

**Myc  
(Myc-JOSD1)**

**Figure 6C**

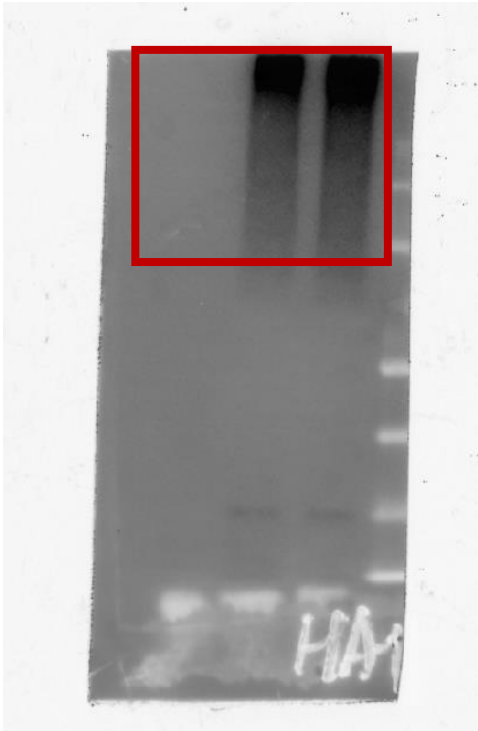

**HA  
(HA-K48R-Ub)**

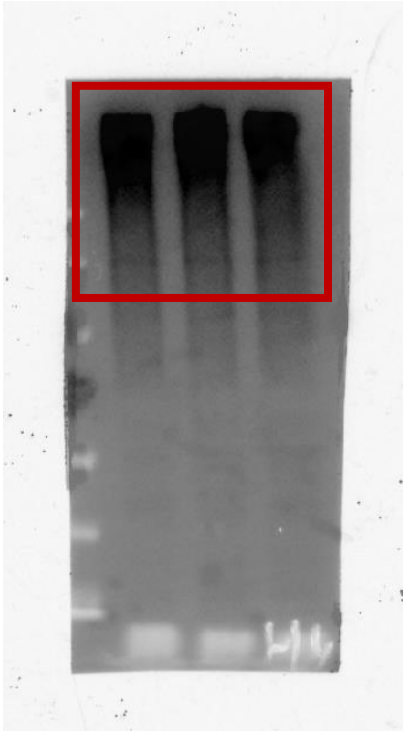

**HA  
(HA-K48R-Ub)**

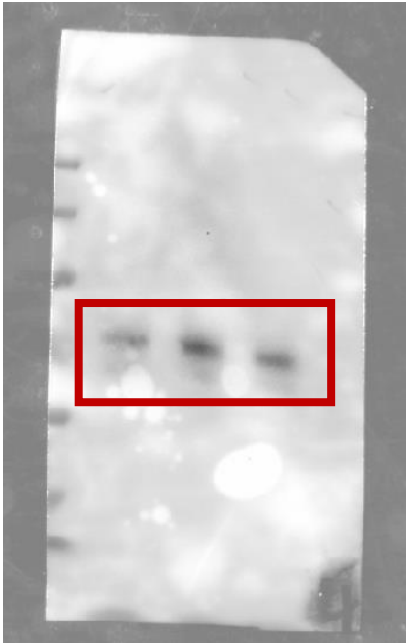

**Flag  
(Flag-YAP)**

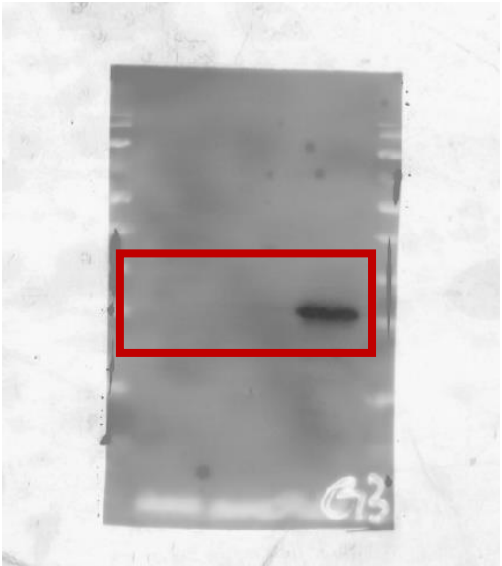

**Myc  
(Myc-JOSD1)**

**Figure 6D**

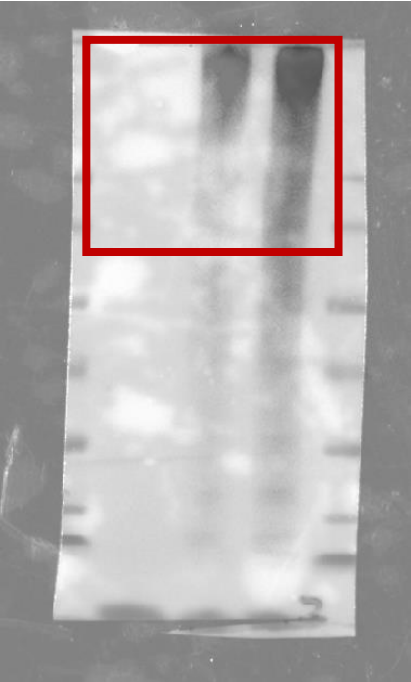

**HA  
(HA-Ub)**

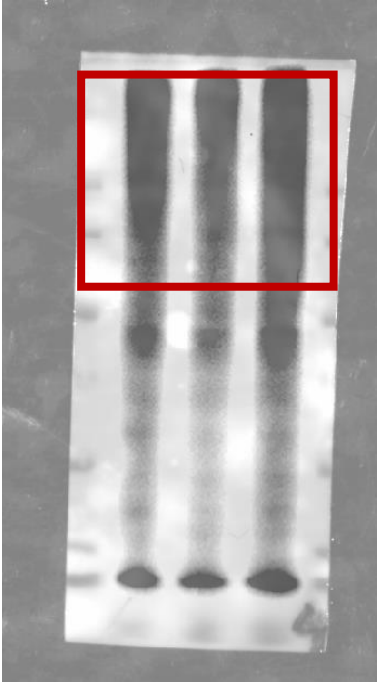

**HA  
(HA-Ub)**

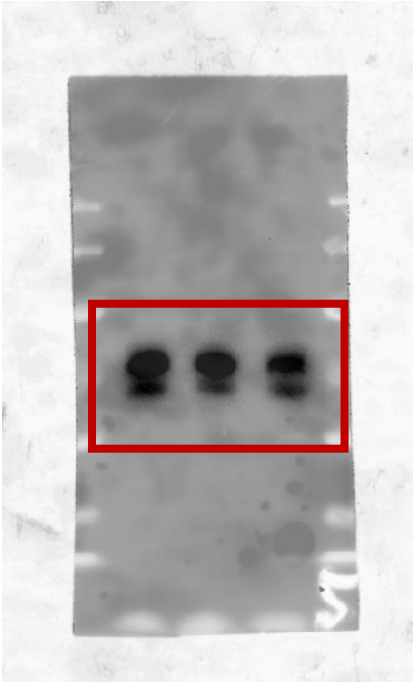

**YAP**

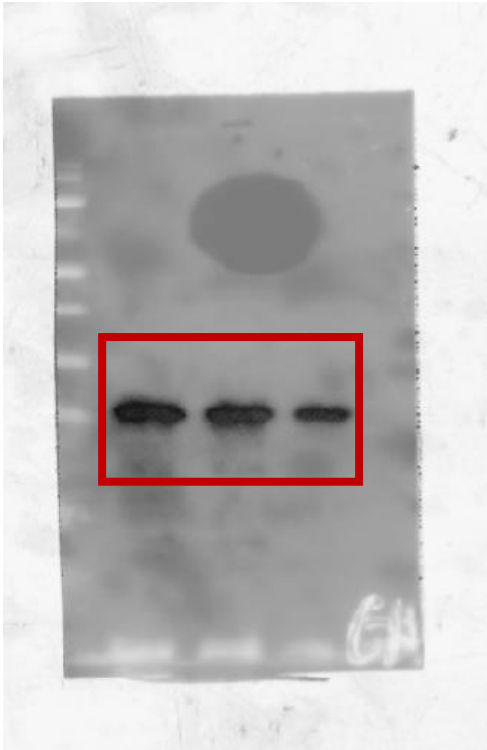

**JOSD1**

**Figure 6E**

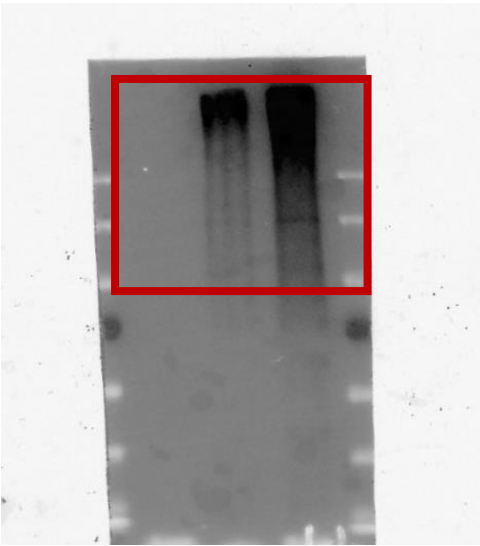

**HA  
(HA-K48-Ub)**

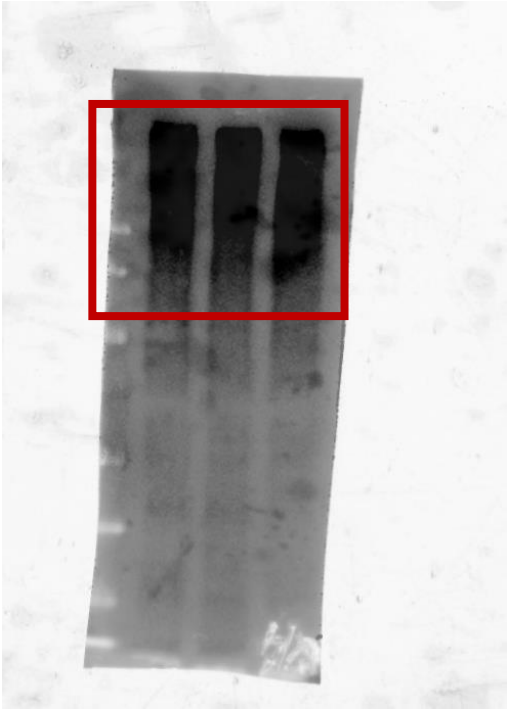

**HA  
(HA-K48-Ub)**

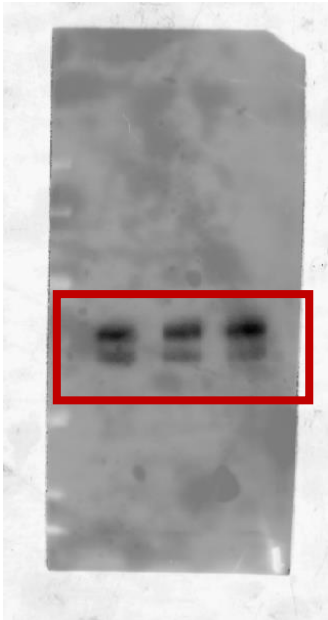

**YAP**

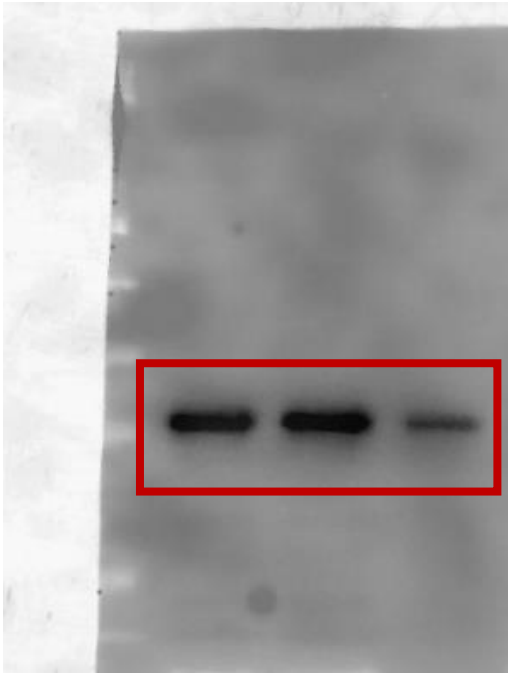

**JOSD1**

**Figure 6F**

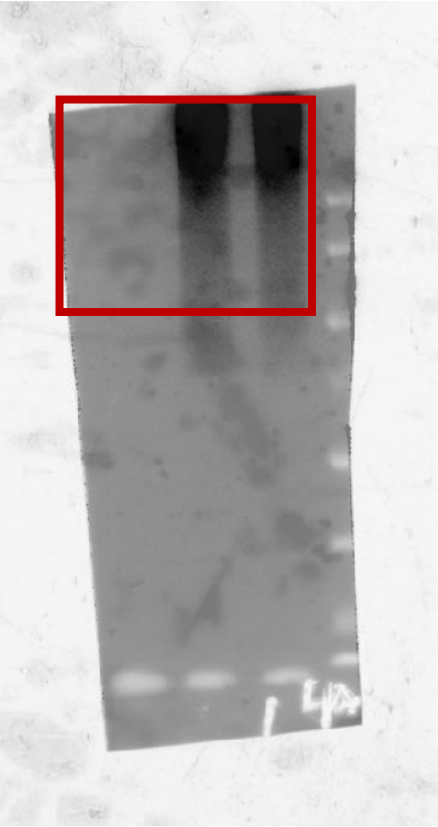

**HA  
(HA-K48R-Ub)**

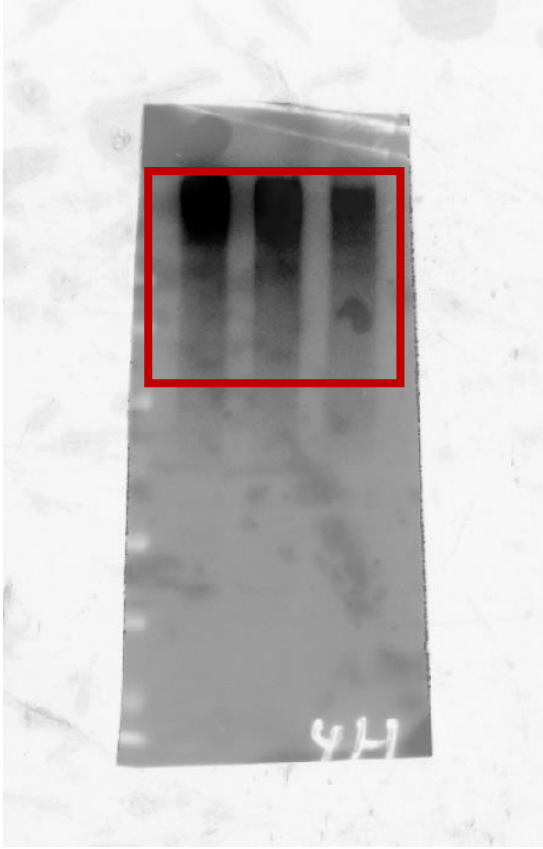

**HA  
(HA-K48R-Ub)**

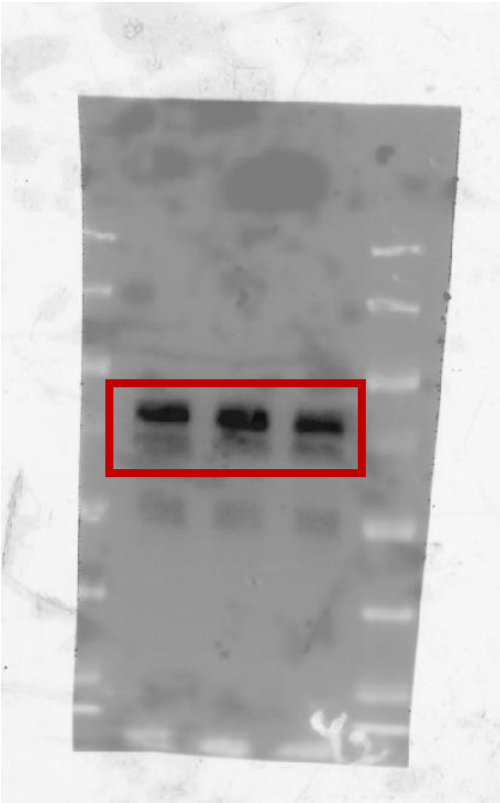

**YAP**

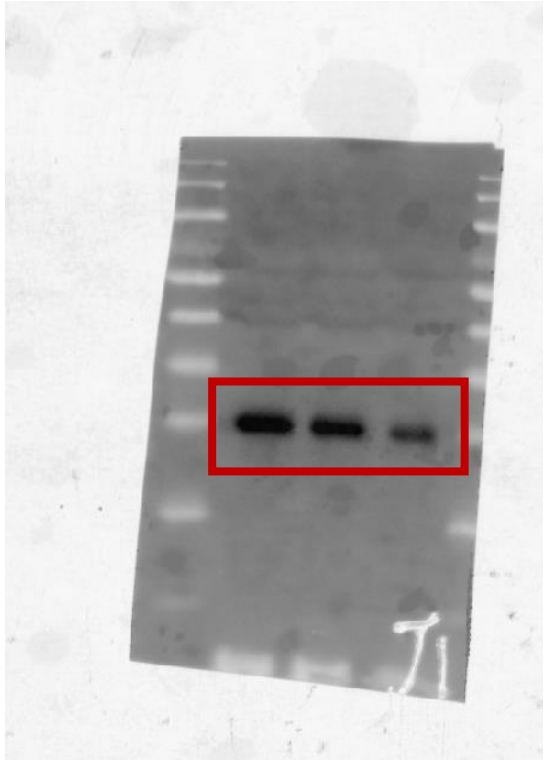

**JOSD1**

**Figure 6G**

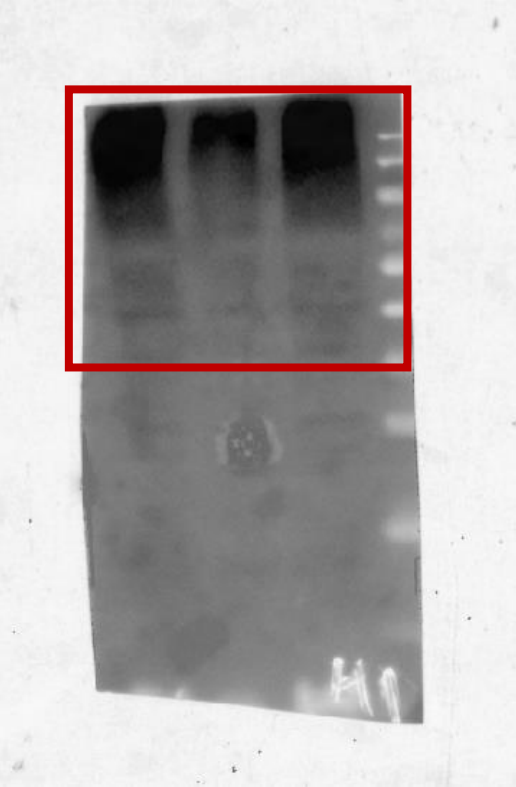

**HA  
(HA-Ub)**

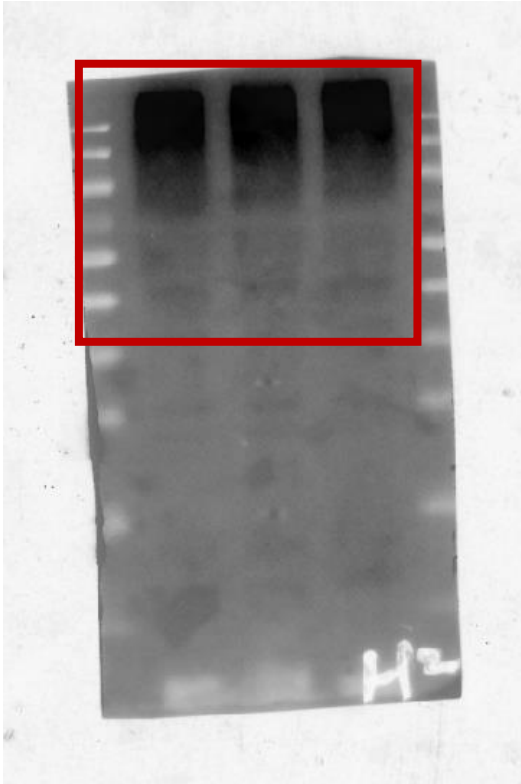

**HA  
(HA-Ub)**

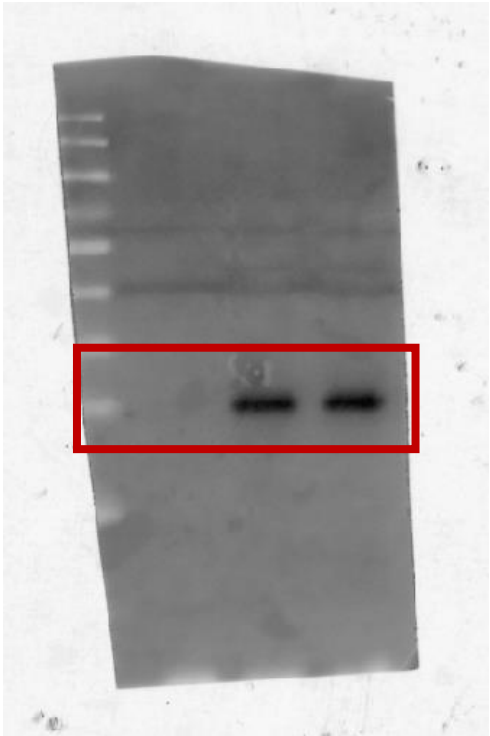

**Flag  
(Flag-YAP)**

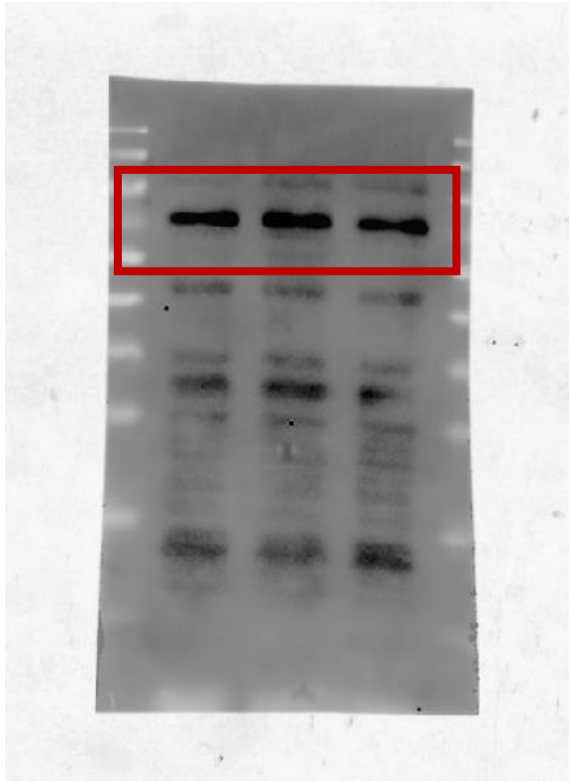

**Myc  
(Myc-JOSD1)**

**Figure 6H**

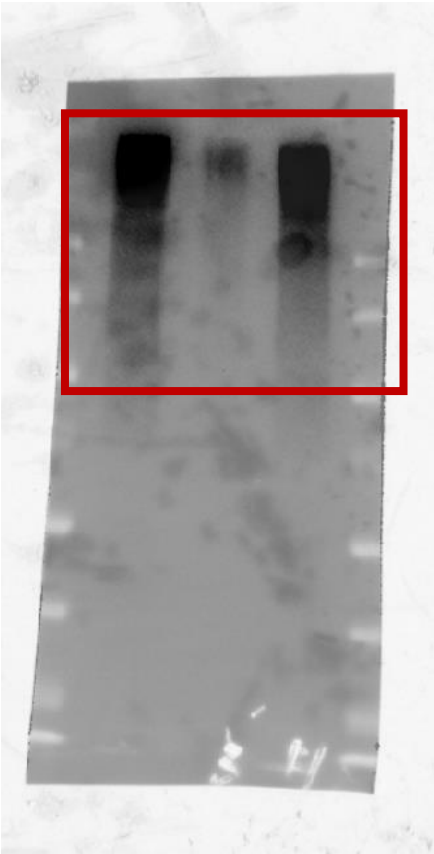

**HA  
(HA-K48-Ub)**

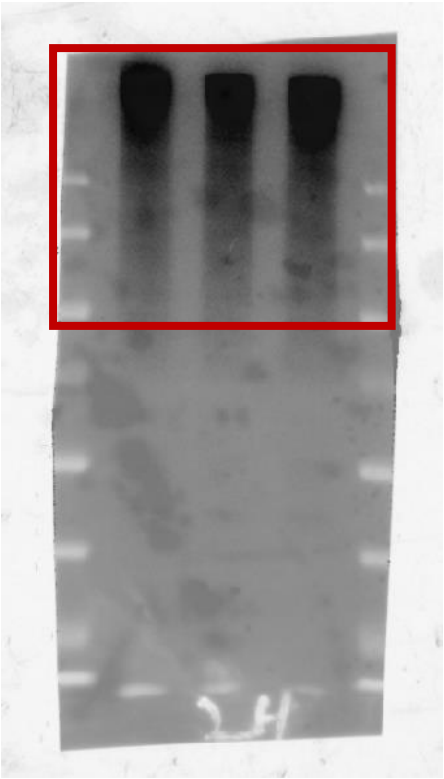

**HA  
(HA-K48-Ub)**

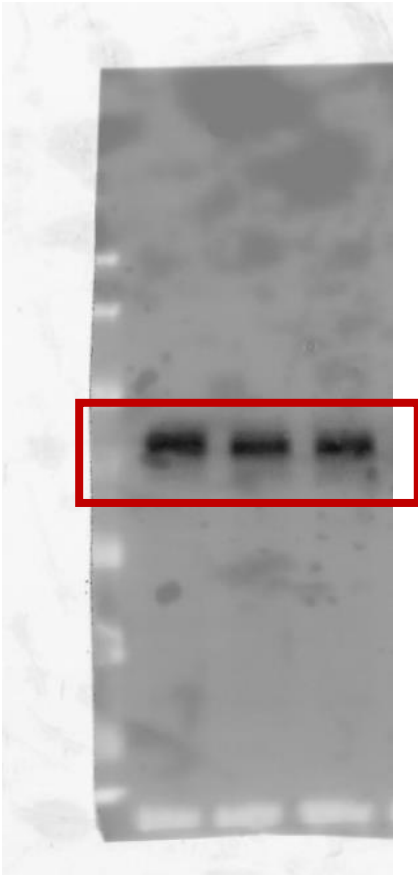

**Flag  
(Flag-YAP)**

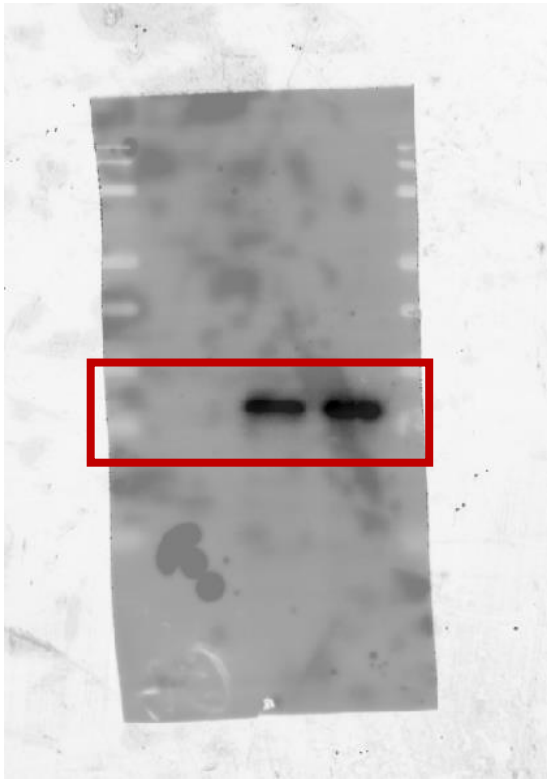

**Myc  
(Myc-JOSD1)**



**Figure 6l**

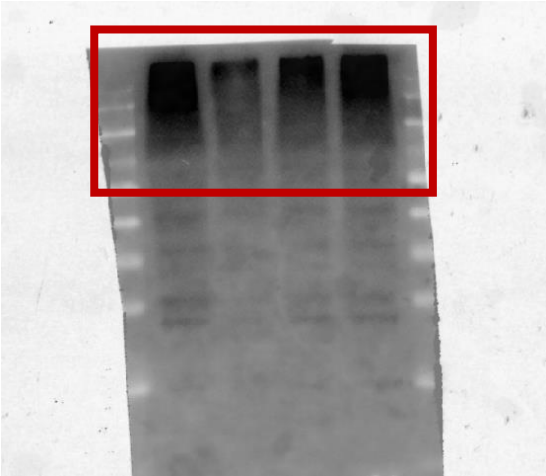

**HA  
(HA-Ub)**

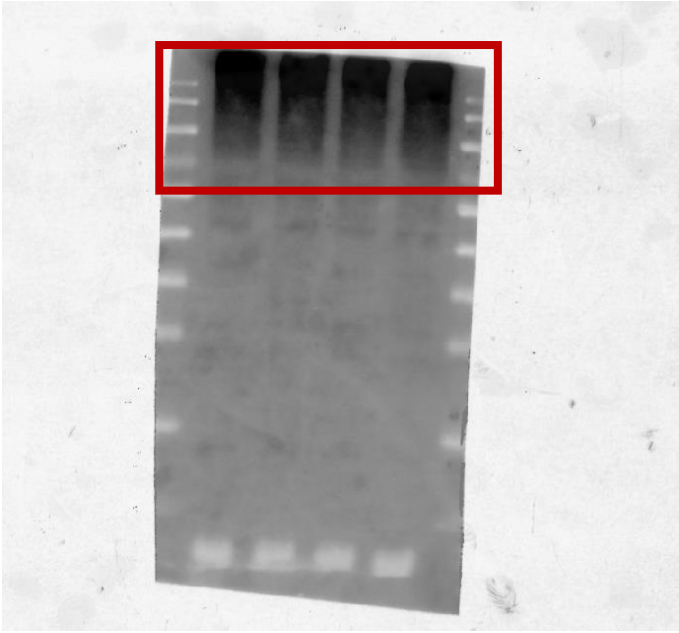

**HA  
(HA-Ub)**

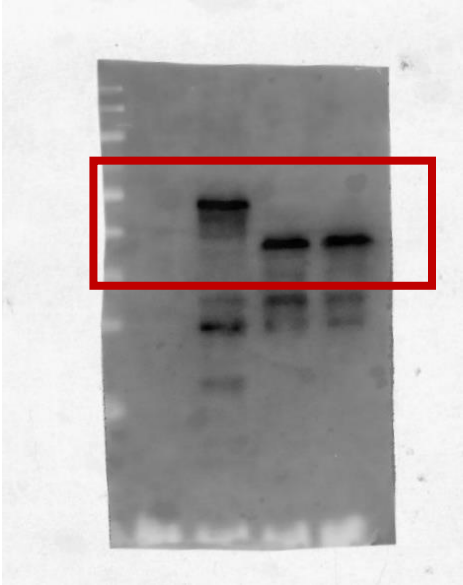

**EGFP  
(EGFP-JOSD1)**

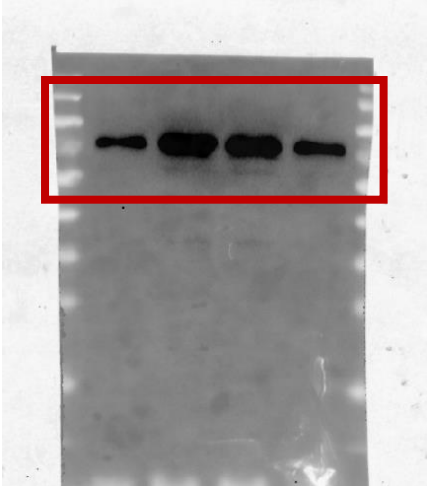

**Flag  
(Flag-YAP)**



**Figure 6K**

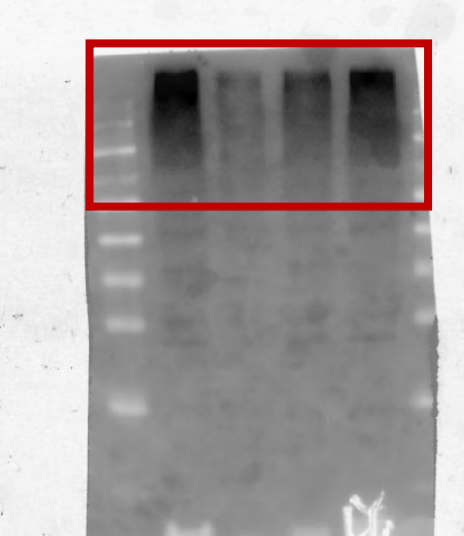

**HA  
(HA-K48-Ub)**

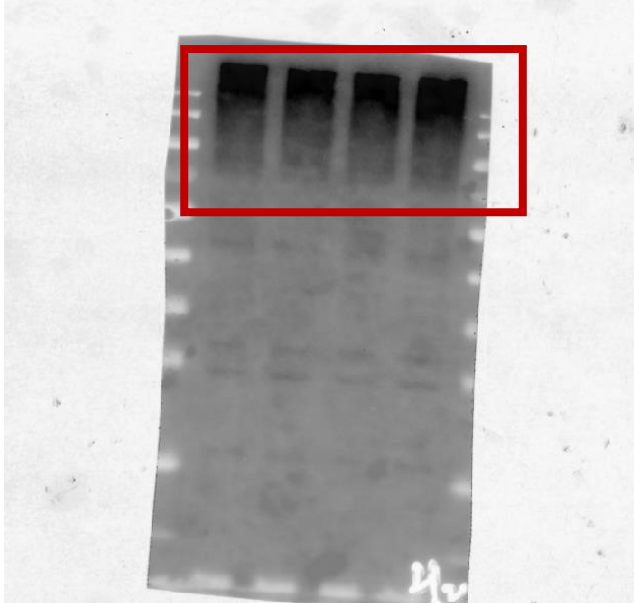

**HA  
(HA-K48-Ub)**

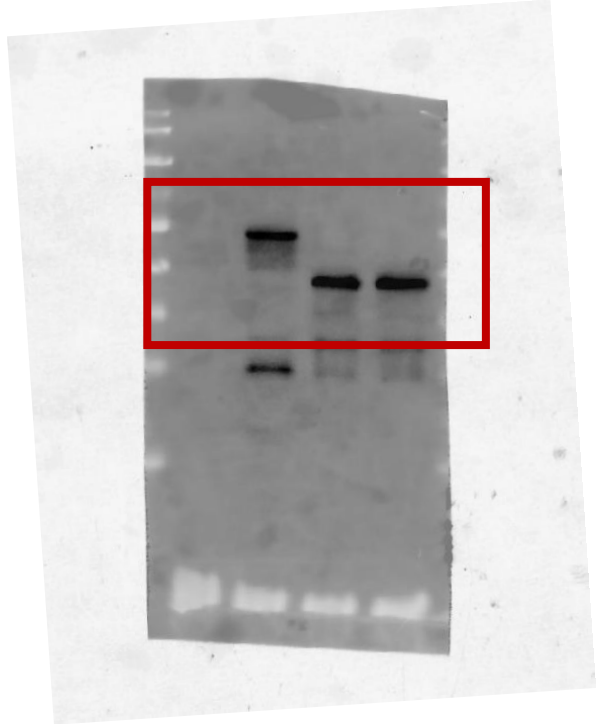

**EGFP  
(EGFP-JOSD1)**

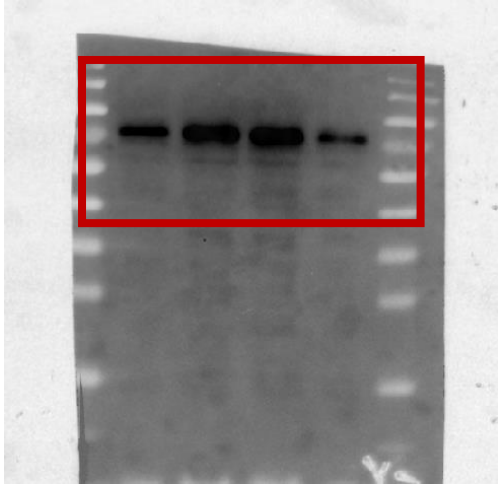

**Flag  
(Flag-YAP)**

**Figure 7C**

|          | siControl |          |          | siYAP    |          |          |
|----------|-----------|----------|----------|----------|----------|----------|
| IgG      | 1.006695  | 0.996831 | 0.996474 | 0.999957 | 1.004199 | 0.995844 |
| Anti-YAP | 6.833497  | 6.839593 | 6.827406 | 2.564648 | 2.425282 | 2.493992 |

**Figure 7D**

|          | siControl |          |          | siYAP    |          |          |
|----------|-----------|----------|----------|----------|----------|----------|
| IgG      | 1.009958  | 0.989887 | 1.000155 | 0.995391 | 1.011522 | 0.993087 |
| Anti-YAP | 9.78112   | 9.460243 | 9.149893 | 3.172778 | 3.029054 | 3.100083 |

**Figure 7E**

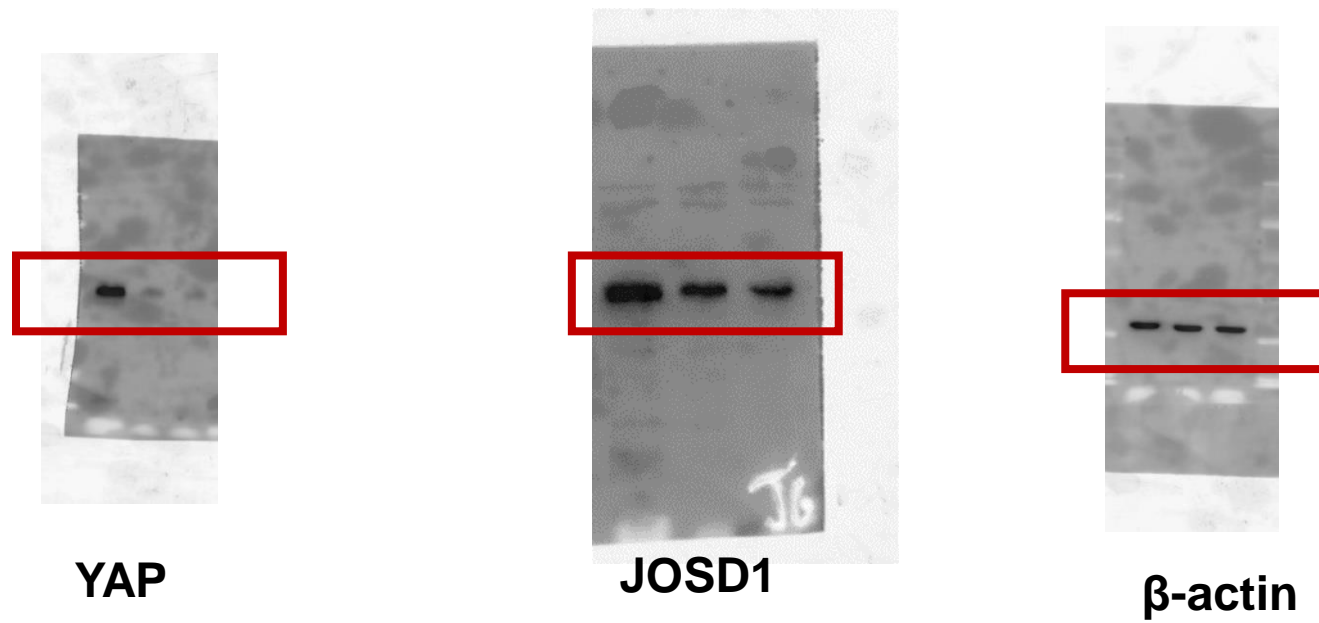

**Figure 7F**

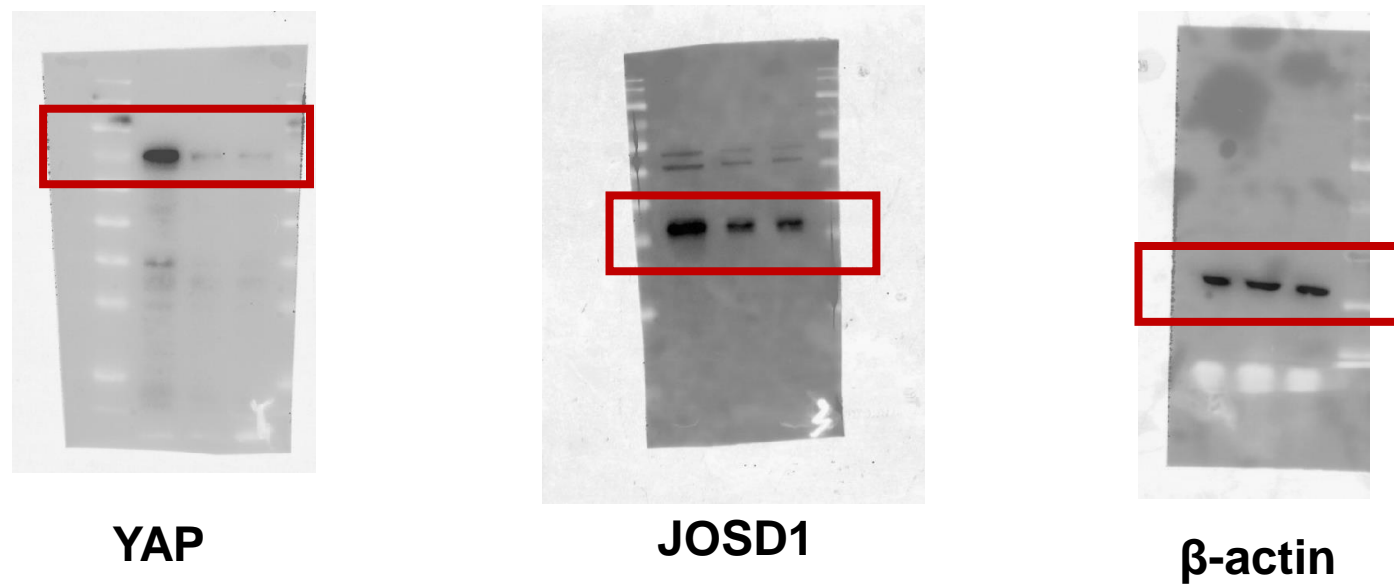

**Figure 7G**

|       | siControl |          |          | siYAP#1  |          |          | siYAP#2  |          |          |
|-------|-----------|----------|----------|----------|----------|----------|----------|----------|----------|
| CYR61 | 0.931855  | 1.069729 | 0.998415 | 0.402846 | 0.443073 | 0.487318 | 0.328354 | 0.228034 | 0.273635 |
| JOSD1 | 0.767859  | 1.113763 | 1.118378 | 0.314537 | 0.314944 | 0.283097 | 0.306688 | 0.258839 | 0.286773 |

**Figure 7H**

|       | siControl |          |          | siYAP#1  |          |          | siYAP#2  |          |          |
|-------|-----------|----------|----------|----------|----------|----------|----------|----------|----------|
| CYR61 | 0.83813   | 1.089733 | 1.072136 | 0.363626 | 0.386752 | 0.373415 | 0.284346 | 0.328271 | 0.329177 |
| JOSD1 | 0.998494  | 0.980947 | 1.020559 | 0.234844 | 0.232694 | 0.263514 | 0.187698 | 0.182649 | 0.185991 |

**Figure 7I**

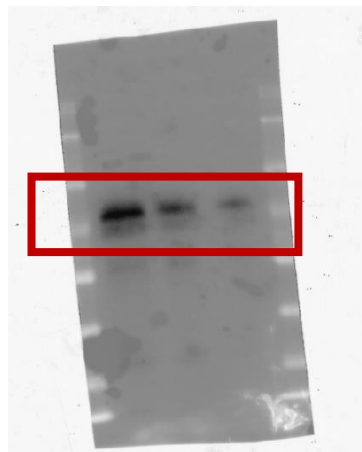

**YAP**

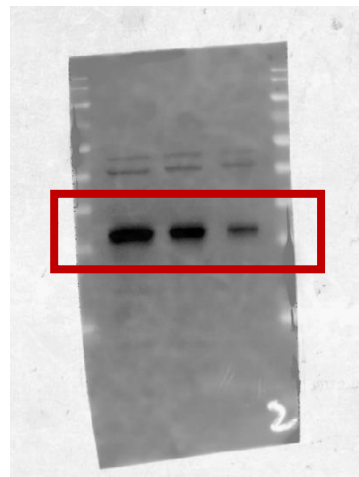

**JOSD1**

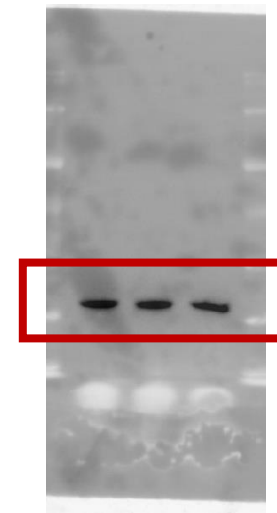

**$\beta$ -actin**

**Figure 7J**

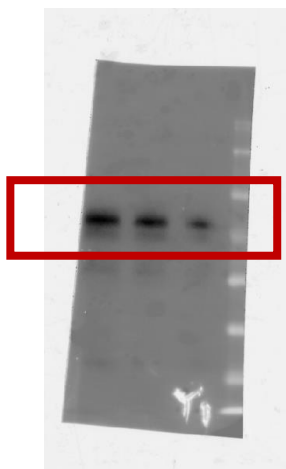

**YAP**

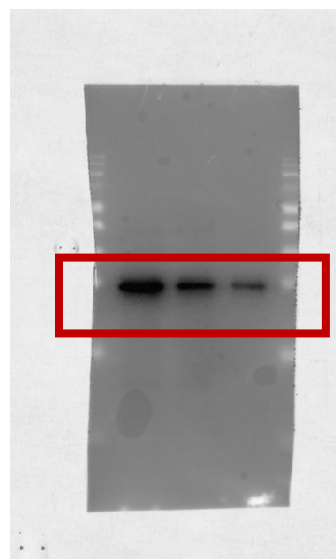

**JOSD1**

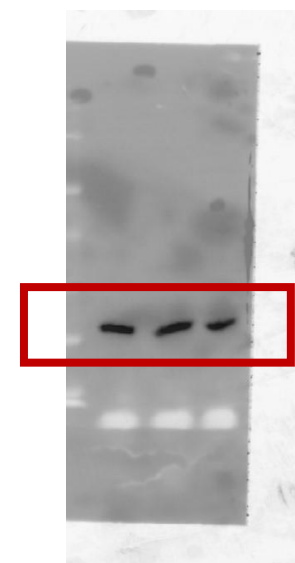

**$\beta$ -actin**

**Figure 7K**

|       | Vehicle  |          |          | Verteporfin 2uM |          |          | Verteporfin 4uM |          |          |
|-------|----------|----------|----------|-----------------|----------|----------|-----------------|----------|----------|
| CYR61 | 0.803029 | 1.205333 | 0.991638 | 0.254311        | 0.348312 | 0.241922 | 0.17831         | 0.163674 | 0.169828 |
| JOSD1 | 0.812056 | 1.196642 | 0.991302 | 0.257125        | 0.236405 | 0.320384 | 0.177412        | 0.22937  | 0.186382 |

**Figure 7L**

|       | Vehicle  |          |          | Verteporfin 2uM |          |          | Verteporfin 4uM |          |          |
|-------|----------|----------|----------|-----------------|----------|----------|-----------------|----------|----------|
| CYR61 | 0.907031 | 1.181345 | 0.911624 | 0.264468        | 0.2895   | 0.274323 | 0.20309         | 0.249182 | 0.246201 |
| JOSD1 | 0.918064 | 1.095955 | 0.985981 | 0.176897        | 0.215539 | 0.227968 | 0.12827         | 0.119062 | 0.112385 |

**Figure 7M**

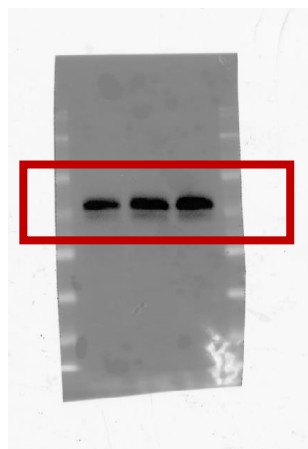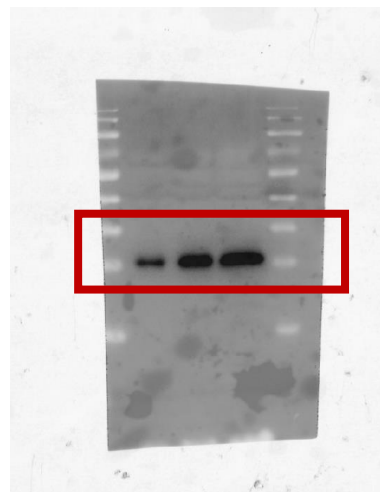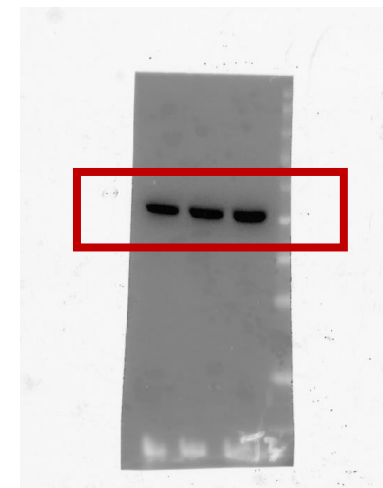

**YAP**

**JOSD1**

**$\beta$ -actin**

**Figure 7N**

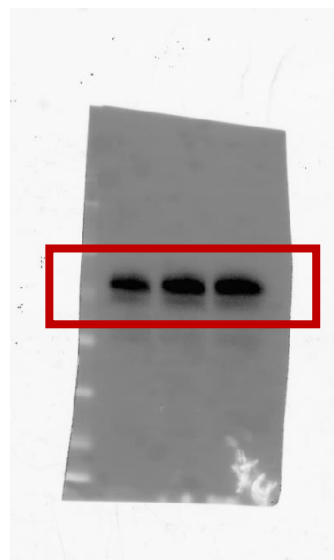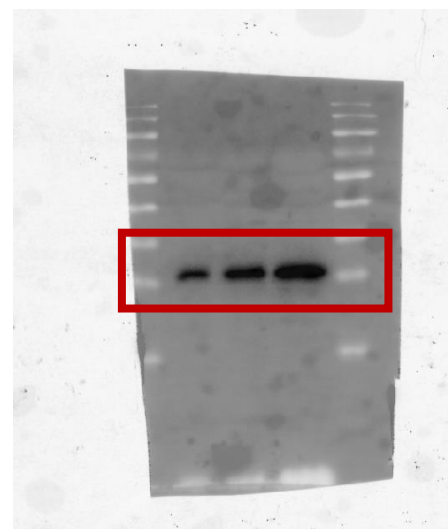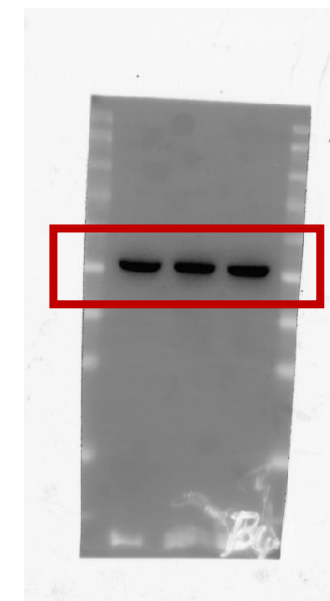

**YAP**

**JOSD1**

**$\beta$ -actin**

**Figure 7O**

|       | Vehicle  |          |          | XMU-MP-1 2uM |          |          | XMU-MP-1 4uM |          |          |
|-------|----------|----------|----------|--------------|----------|----------|--------------|----------|----------|
| CYR61 | 0.877272 | 0.942066 | 1.180662 | 2.402137     | 1.939268 | 2.27554  | 5.608655     | 6.045515 | 6.126381 |
| JOSD1 | 0.952154 | 0.829608 | 1.218237 | 1.771275     | 1.422685 | 1.686515 | 3.186074     | 2.884276 | 2.918178 |

**Figure 7P**

|       | Vehicle  |          |          | XMU-MP-1 2uM |          |          | XMU-MP-1 4uM |          |          |
|-------|----------|----------|----------|--------------|----------|----------|--------------|----------|----------|
| CYR61 | 1.034624 | 1.002291 | 0.963084 | 2.4538       | 2.216081 | 1.75114  | 2.70167      | 3.387117 | 2.933048 |
| JOSD1 | 1.091957 | 0.96962  | 0.938423 | 1.551782     | 1.692602 | 1.348577 | 1.983112     | 2.453584 | 2.037836 |



**Figure 7R**

| Vehicle  | Verteporfin |
|----------|-------------|
| 0.900144 | 0.295337    |
| 0.844335 | 0.260412    |
| 1.255521 | 0.349166    |

**Figure 7T**

| Vehicle  | Verteporfin |
|----------|-------------|
| 0.916047 | 0.303519    |
| 1.218756 | 0.233434    |
| 0.865197 | 0.169226    |

**Supplementary Figure 2A**

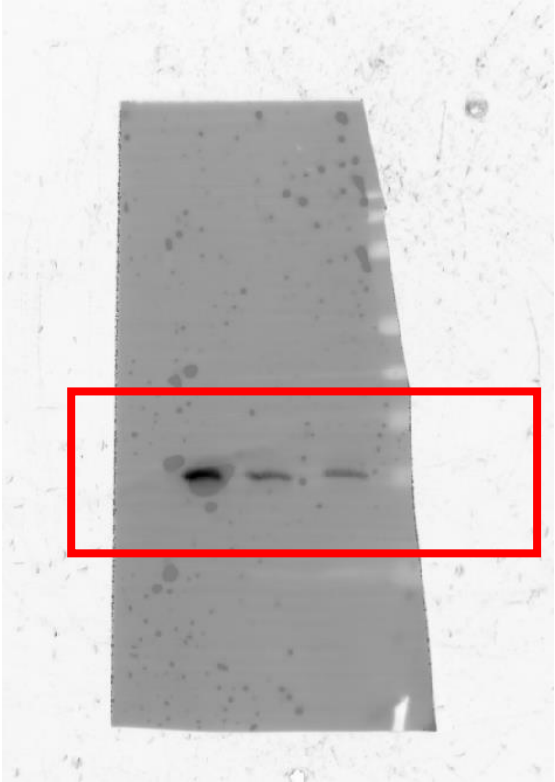

**JOSD1**

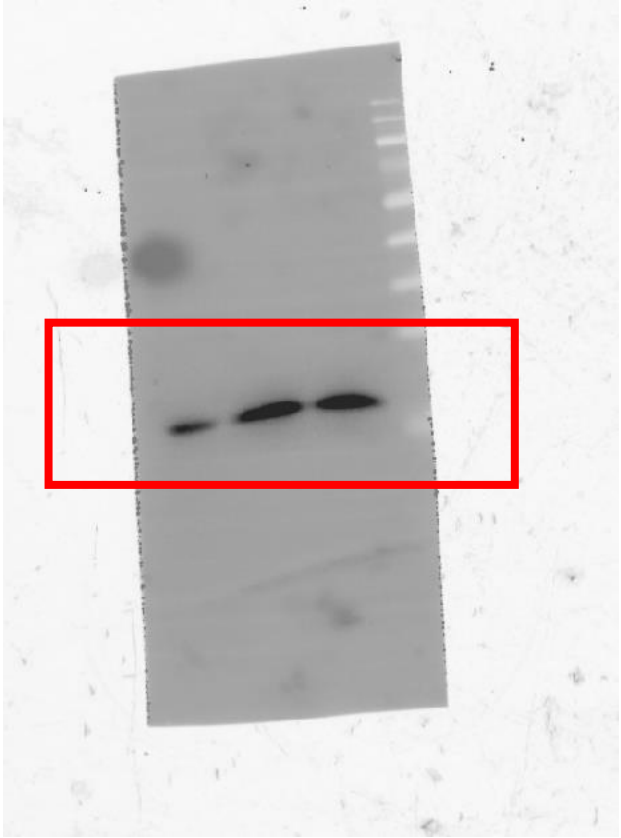

**Cleaved Caspase 3**

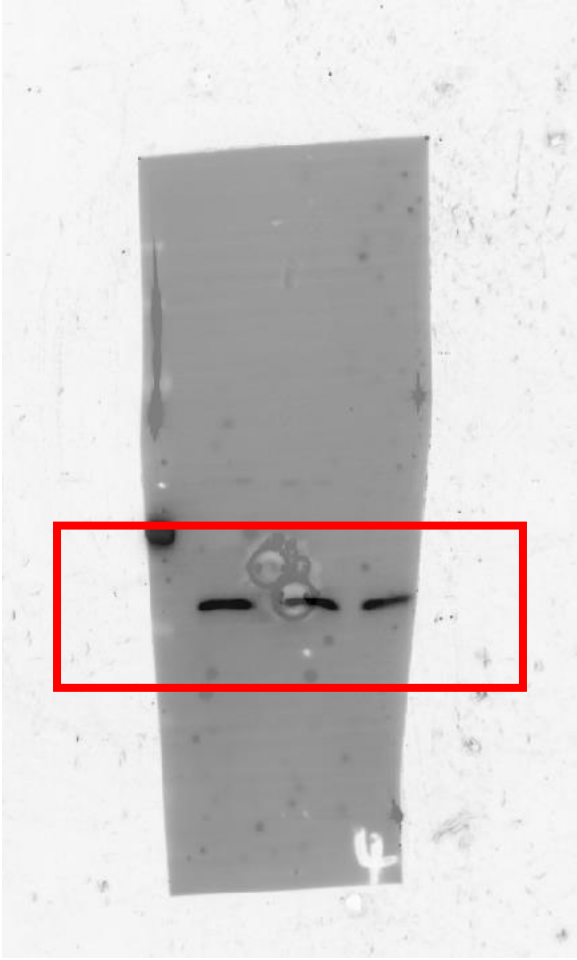

**$\beta$ -actin**

**Supplementary Figure 2B**

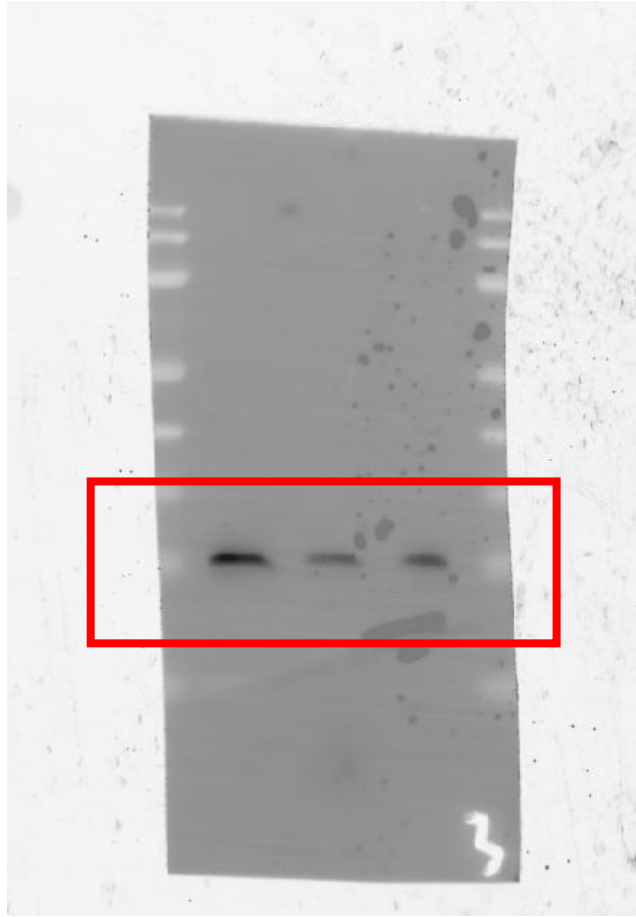

**JOSD1**

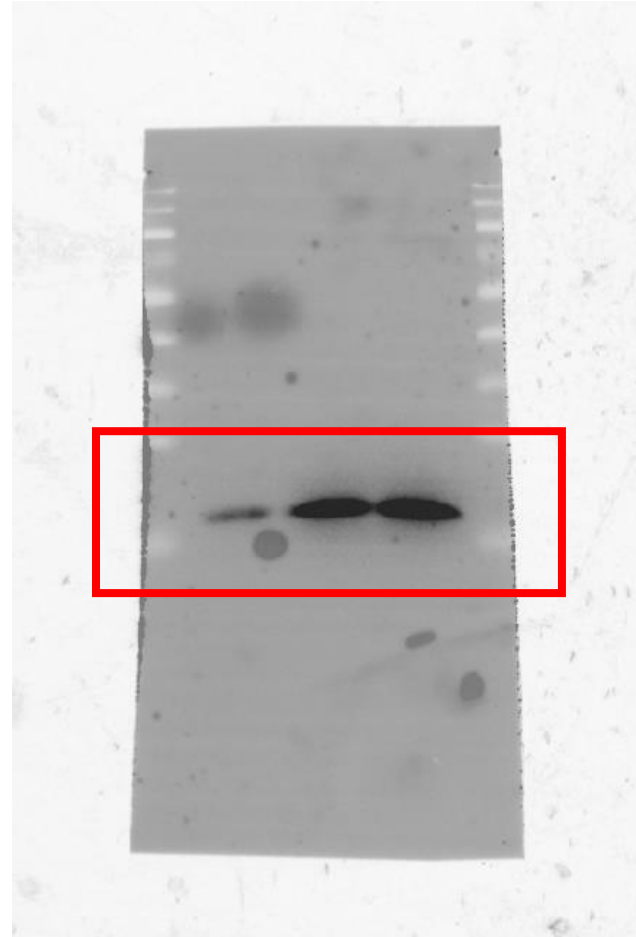

**Cleaved Caspase 3**

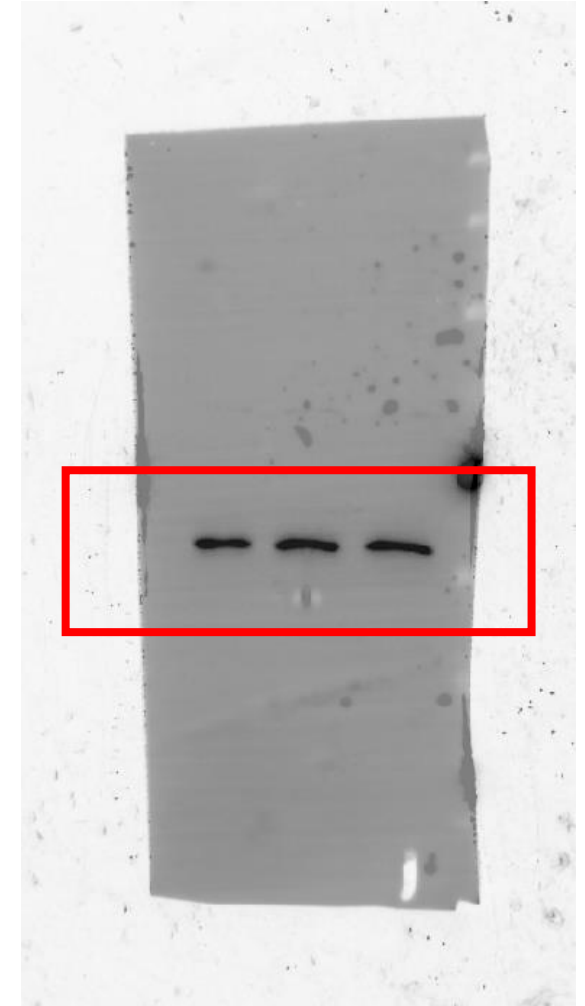

**$\beta$ -actin**

**Supplementary Figure 2C**

|    | siControl |          |          | siJOSD1  |          |          |
|----|-----------|----------|----------|----------|----------|----------|
| 0  | 1         | 0.985498 | 1.014502 | 1.087524 | 0.912476 | 1        |
| 5  | 0.919865  | 0.915341 | 0.986365 | 0.772089 | 0.788279 | 0.766765 |
| 10 | 0.832975  | 0.837499 | 0.828451 | 0.645176 | 0.638114 | 0.620076 |
| 20 | 0.604966  | 0.591951 | 0.666322 | 0.461327 | 0.411235 | 0.466108 |
| 40 | 0.427621  | 0.395641 | 0.400971 | 0.211413 | 0.226516 | 0.212282 |
| 80 | 0.113746  | 0.173615 | 0.160848 | 0.002354 | 0.003984 | 0.035386 |

**Supplementary Figure 2E**

| Vector | Flag-JOSD1 |
|--------|------------|
| 3      | 9          |
| 2      | 14         |
| 4      | 7          |
| 2      | 11         |
| 7      | 11         |

# Supplementary Figure 3A

JOSD1

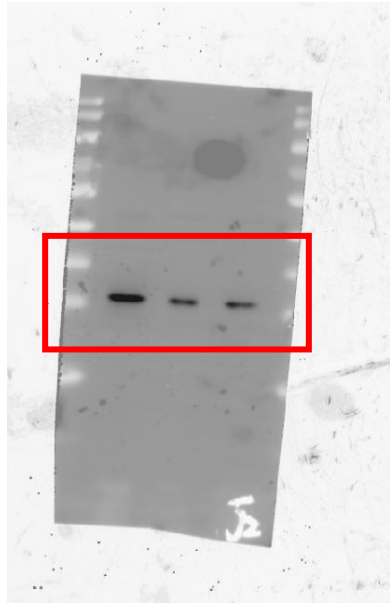

p-YAP

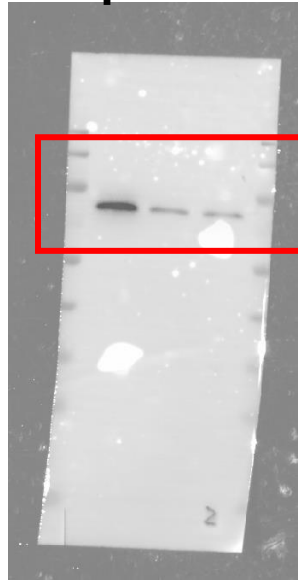

YAP

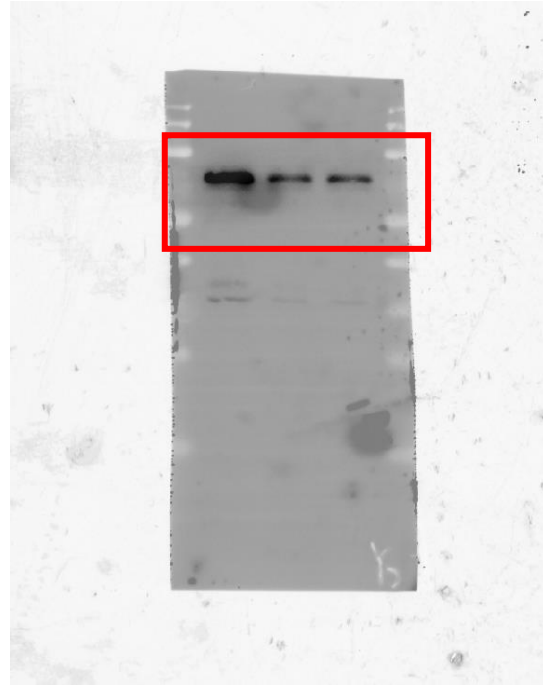

$\beta$ -Actin

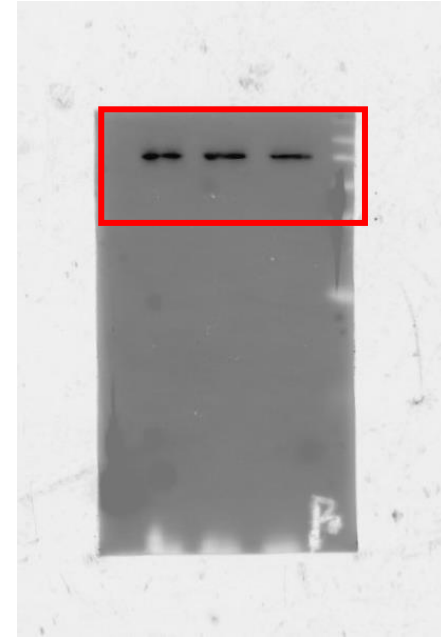

# Supplementary Figure 3B

**JOSD1**

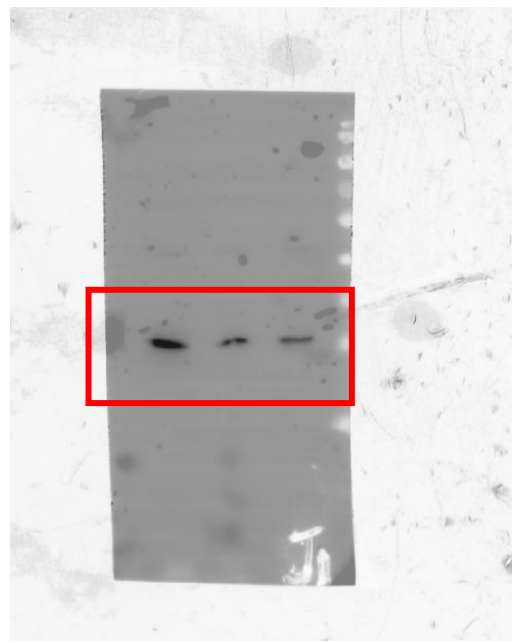

**p-YAP**

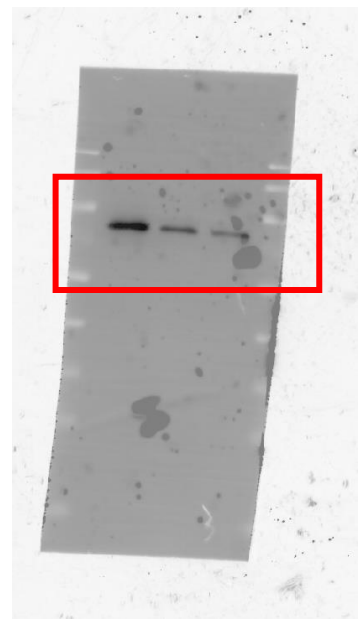

**YAP**

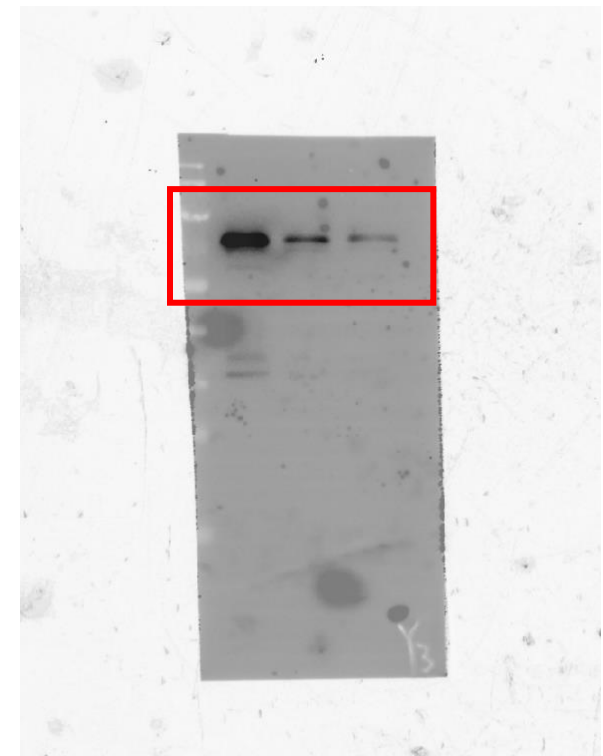

**$\beta$ -Actin**

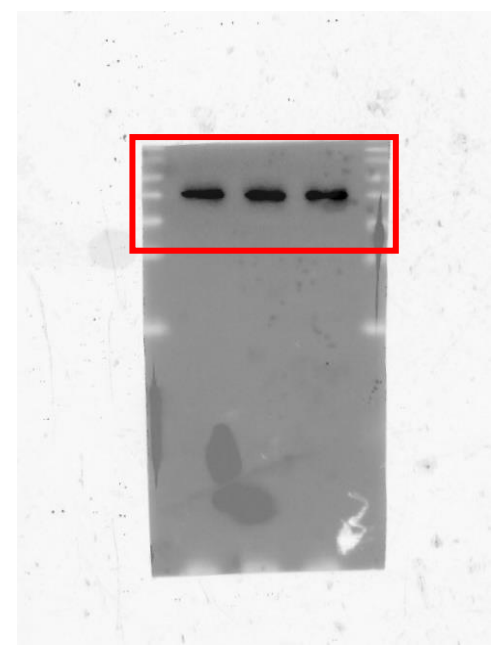

# Supplementary Figure 3C

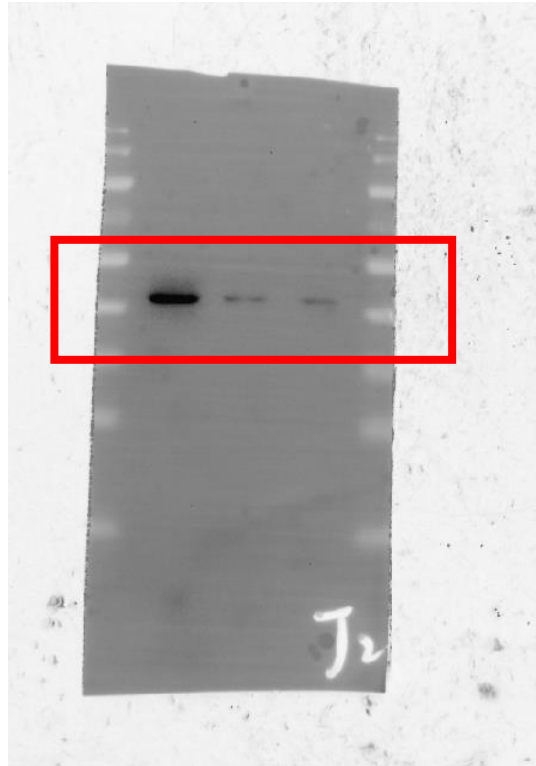

**JOSD1**

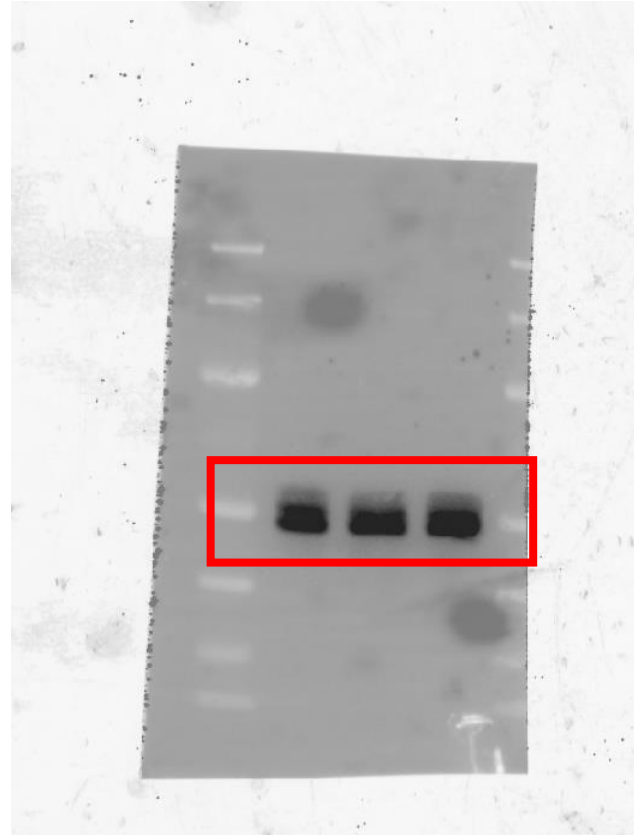

**TAZ**

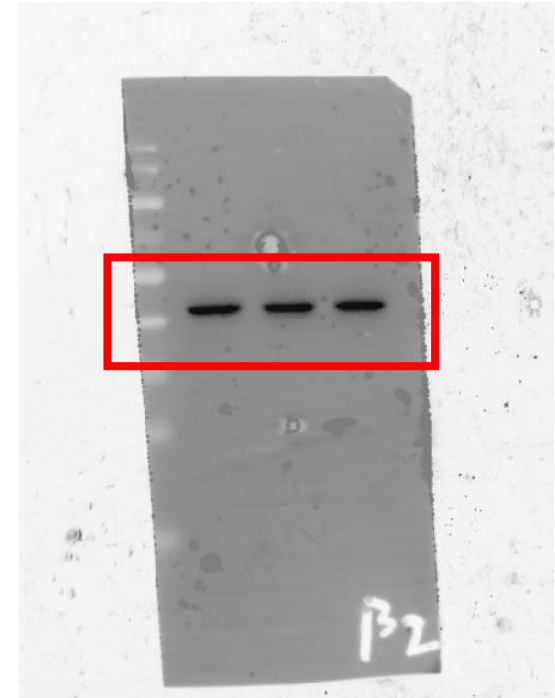

**$\beta$ -actin**

Supplementary Figure 3D

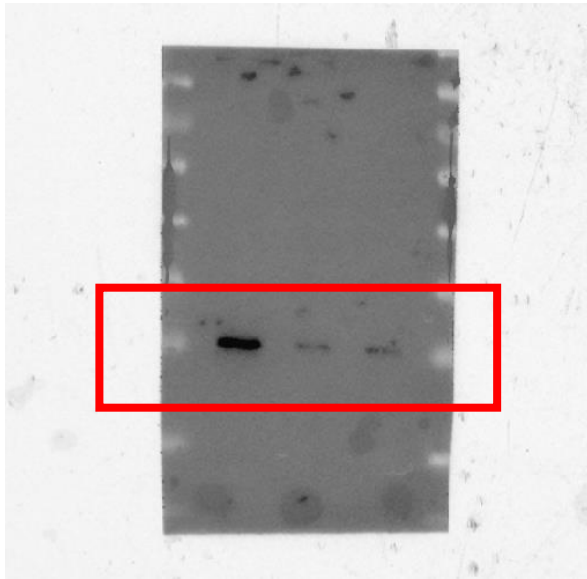

JOSD1

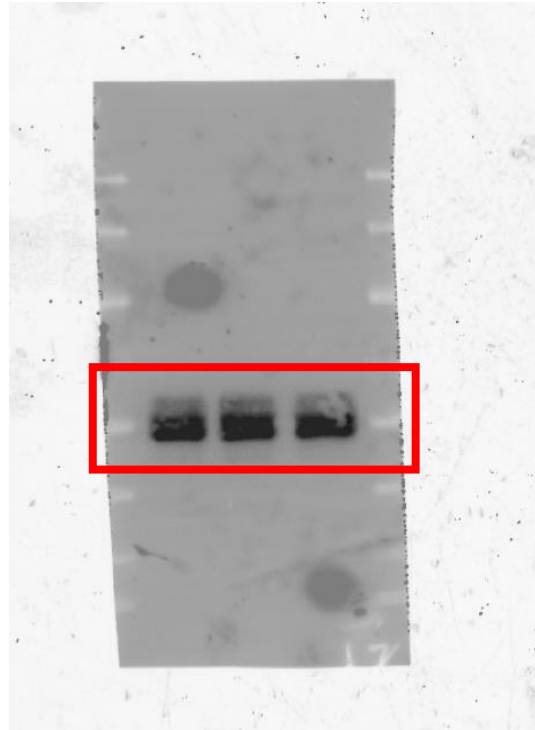

TAZ

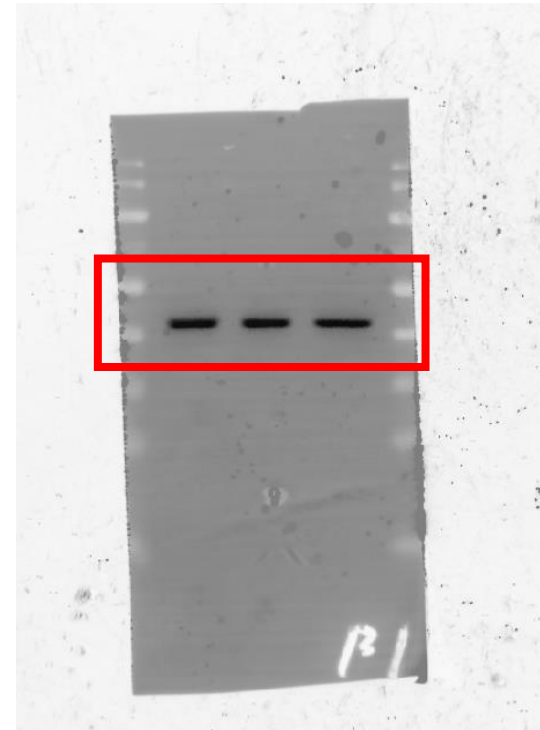

$\beta$ -Actin



# Supplementary Figure 3E

JOSD1

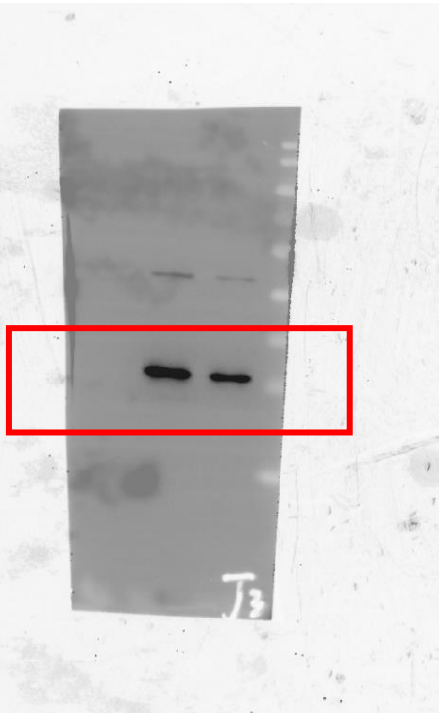

p-YAP

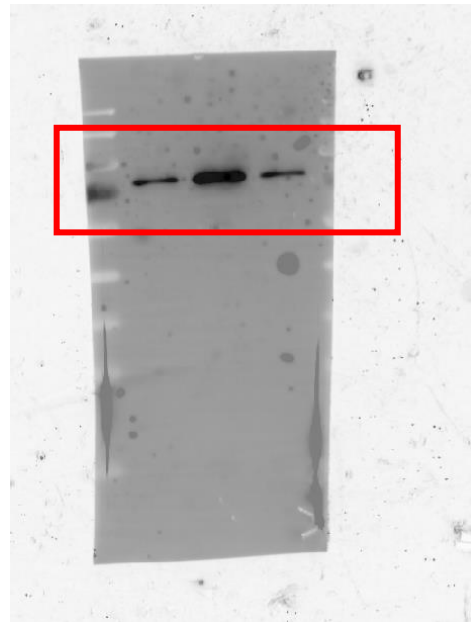

YAP

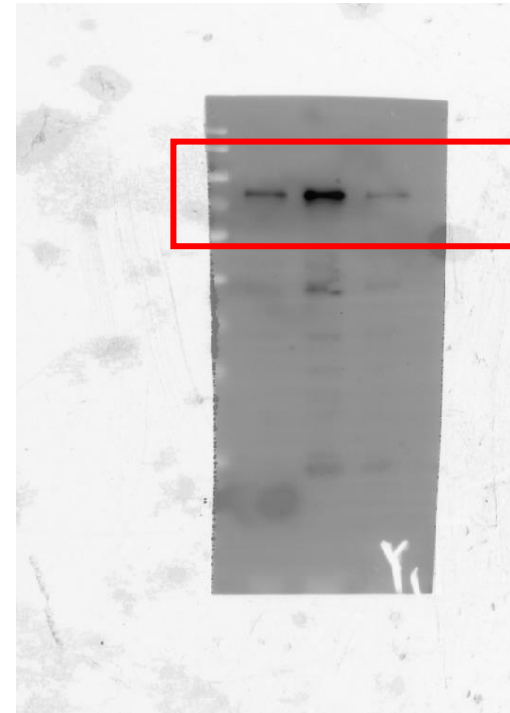

$\beta$ -Actin

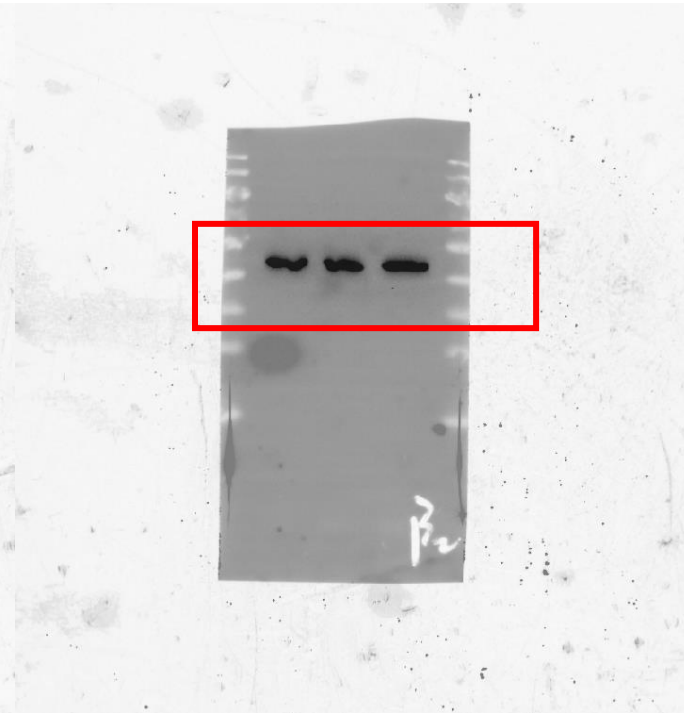

## Supplementary figure 4A

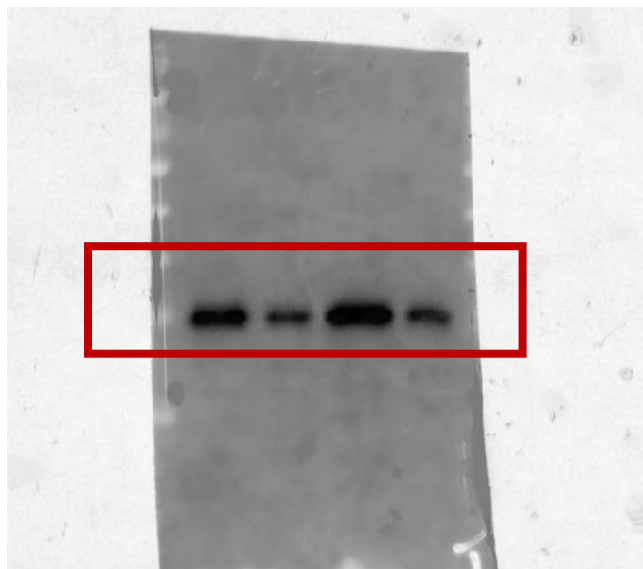

JOSD1

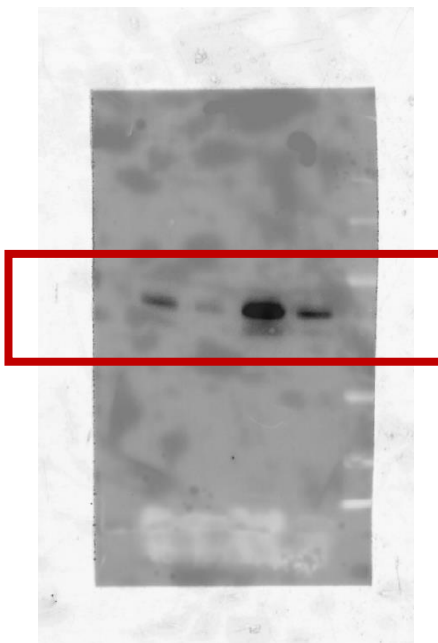

YAP

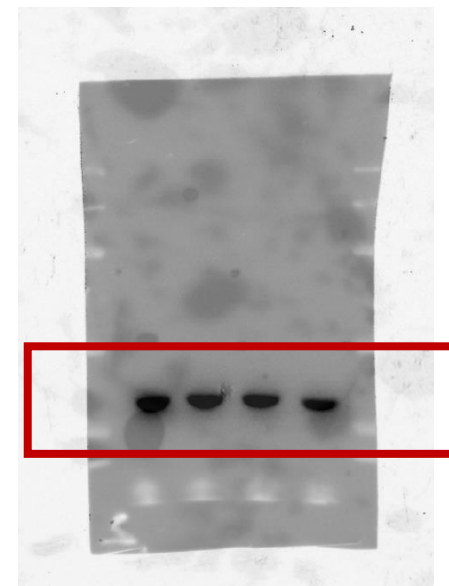

$\beta$ -actin

### Supplementary figure 4B

|       | siControl    |              |              | siJOSD1      |              |              | YAP          |              |              | siJOSD1+YAP  |              |              |
|-------|--------------|--------------|--------------|--------------|--------------|--------------|--------------|--------------|--------------|--------------|--------------|--------------|
| CYR61 | 0.90947<br>7 | 1.21796<br>5 | 0.87255<br>9 | 0.24546<br>4 | 0.18180<br>3 | 0.23339<br>2 | 5.04829<br>1 | 5.08626<br>9 | 4.84523<br>4 | 0.92622<br>8 | 0.89405<br>5 | 1.04012<br>1 |
| CTGF  | 0.95203<br>5 | 0.98272<br>3 | 1.06524<br>3 | 0.42128<br>1 | 0.20713<br>2 | 0.35826<br>9 | 2.03678<br>8 | 2.26021<br>7 | 2.00938<br>1 | 1.09433<br>1 | 1.40962<br>3 | 0.74793<br>1 |

### Supplementary figure 4C

| siControl | siJOSD1  | YAP      | siJOSD1+YAP |
|-----------|----------|----------|-------------|
| 0.999983  | 0.208746 | 1.961864 | 1.279897    |
| 0.992827  | 0.145899 | 2.397747 | 1.187256    |
| 1.00719   | 0.135397 | 2.339624 | 1.339288    |

### Supplementary figure 4D

| Time(h) | siControl |          |          | siJOSD1  |          |          | YAP      |          |          | siJOSD1+YAP |          |          |
|---------|-----------|----------|----------|----------|----------|----------|----------|----------|----------|-------------|----------|----------|
| 0       | 1.011407  | 0.980989 | 1.007604 | 0.961228 | 0.961228 | 1.013732 | 1.068376 | 0.920746 | 1.056721 | 0.974771    | 1.001529 | 1.032111 |
| 24      | 2.395437  | 2.079848 | 2.091255 | 1.550889 | 1.437803 | 1.587237 | 3.411033 | 3.030303 | 3.022533 | 1.995413    | 2.090979 | 2.133028 |
| 48      | 5.361217  | 5.433469 | 5.498099 | 2.940226 | 2.742326 | 2.778675 | 7.327117 | 7.331002 | 7.226107 | 4.980887    | 5.087929 | 5.057339 |
| 72      | 8.391635  | 8.095057 | 8.300388 | 4.955574 | 5.084814 | 5.214055 | 12.73893 | 12.64569 | 12.59907 | 7.863157    | 7.584098 | 7.652905 |

### Supplementary figure 4F

| siControl | siJOSD1     | YAP        | siJOSD1+YAP |
|-----------|-------------|------------|-------------|
| 0.899579  | 0.30872447  | 3.18737682 | 1.017847    |
| 0.954679  | 0.3367868   | 3.0876348  | 0.967362    |
| 1.145742  | 0.278237487 | 2.5982749  | 0.870108    |

### Supplementary figure 4H

| Time(h) | siControl |          |          | siJOSD1  |          |          | YAP      |          |          | siJOSD1+YAP |          |          |
|---------|-----------|----------|----------|----------|----------|----------|----------|----------|----------|-------------|----------|----------|
| 0       | 0         | 0        | 0        | 0        | 0        | 0        | 0        | 0        | 0        | 0           | 0        | 0        |
| 24      | 0.590909  | 0.629871 | 0.649351 | 0.227737 | 0.264964 | 0.244453 | 0.753425 | 0.732877 | 0.815068 | 0.571429    | 0.526316 | 0.616541 |
| 48      | 0.707792  | 0.766234 | 0.785714 | 0.405839 | 0.440146 | 0.527737 | 0.958904 | 0.979452 | 0.897268 | 0.684211    | 0.774436 | 0.706767 |

### Supplementary figure 4J

| siControl | siJOSD1  | YAP      | siJOSD1+YAP |
|-----------|----------|----------|-------------|
| 0.92545   | 0.262211 | 2.745501 | 1.056555    |
| 1.056555  | 0.33162  | 2.899743 | 1.133676    |
| 1.017995  | 0.215938 | 2.984576 | 1.1491      |

### Supplementary figure 4L

| siControl | siJOSD1 | YAP  | siJOSD1+YAP |
|-----------|---------|------|-------------|
| 16.48     | 24.37   | 8.53 | 17.01       |
| 15.47     | 21.53   | 7.46 | 15.19       |
| 14.6      | 26.57   | 7.64 | 15.36       |

Supplementary figure 5A

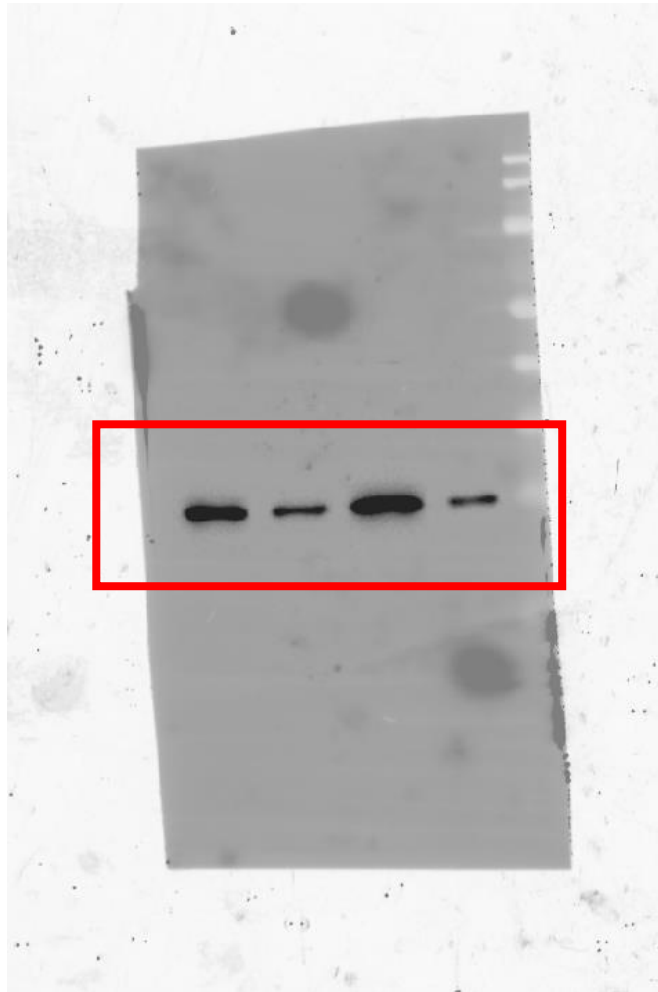

JOSD1

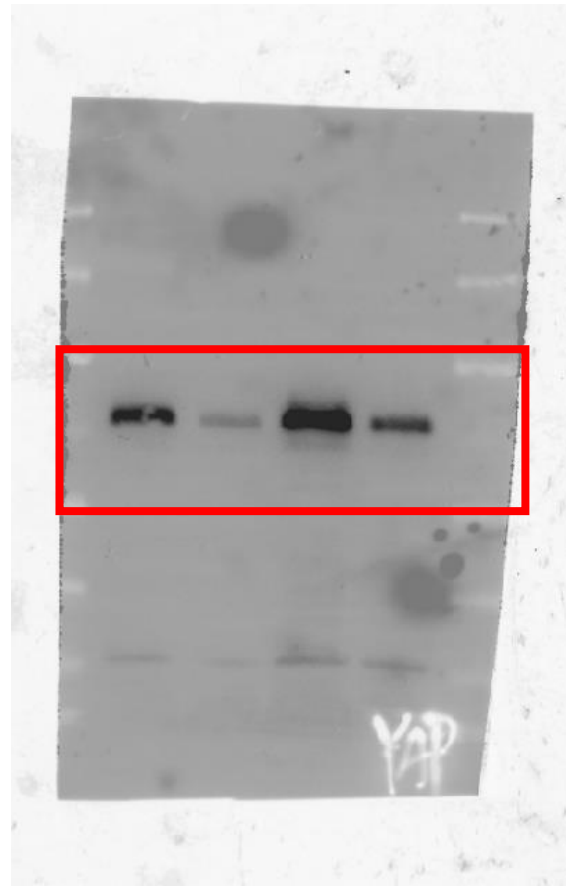

YAP

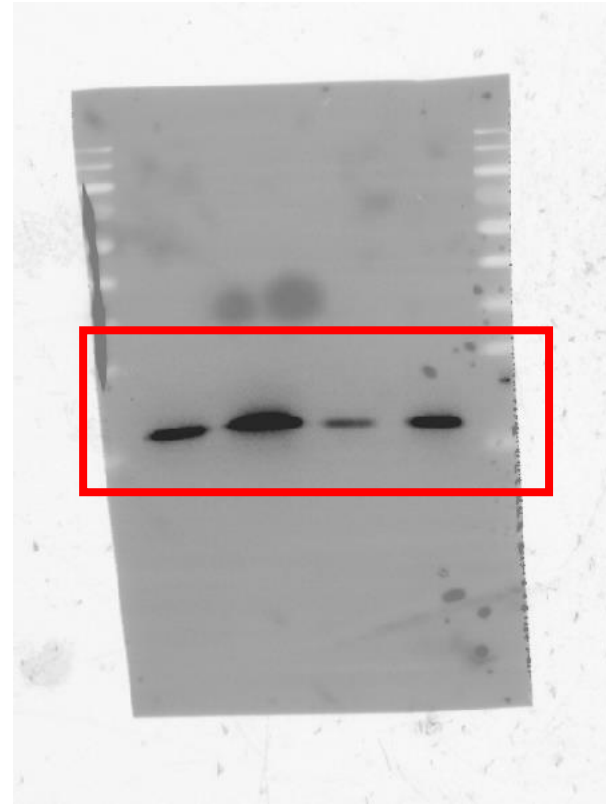

Cleaved Caspase 3

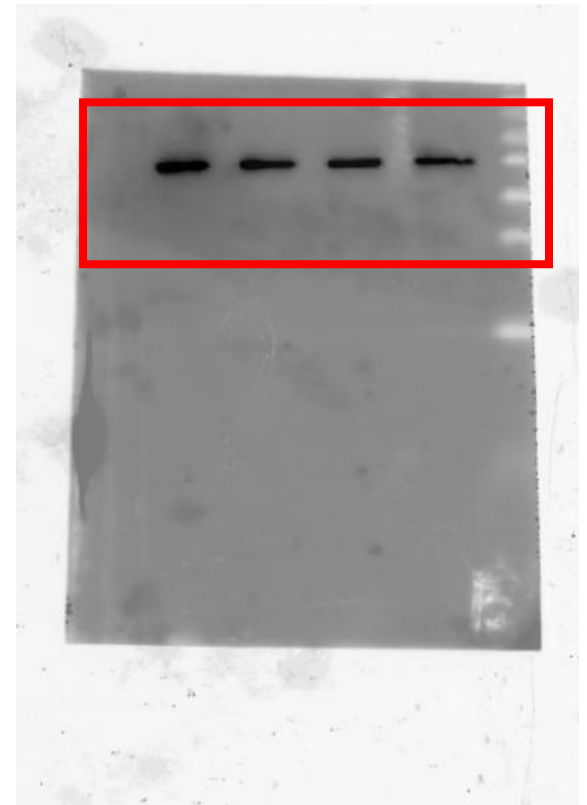

$\beta$ -actin

## Supplementary figure 5C

| siControl | siJOSD1  | YAP      | siJOSD1+YAP |
|-----------|----------|----------|-------------|
| 1.030973  | 0.429204 | 1.420354 | 1.026549    |
| 1.066372  | 0.353982 | 1.495575 | 0.902655    |
| 0.902655  | 0.469027 | 1.300885 | 0.986726    |

# Supplementary Figure 6A

## YAP

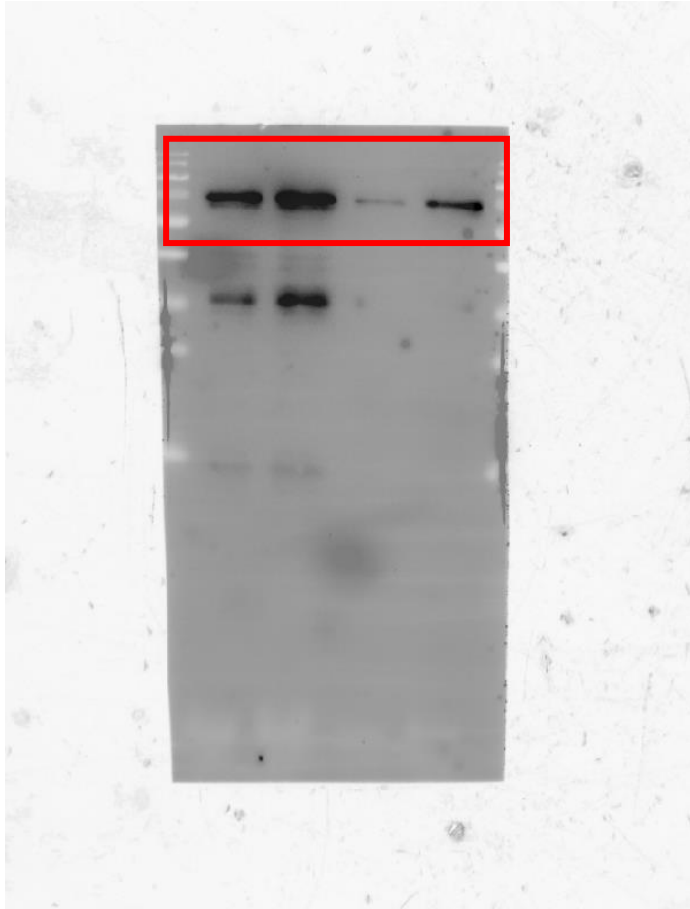

## Tubulin

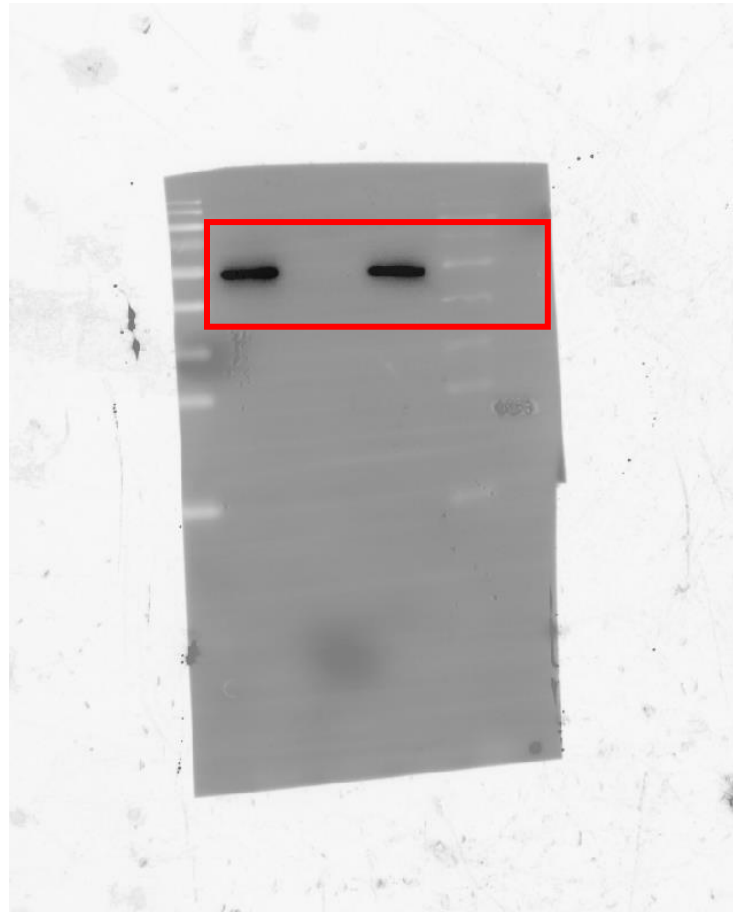

## Histone 3

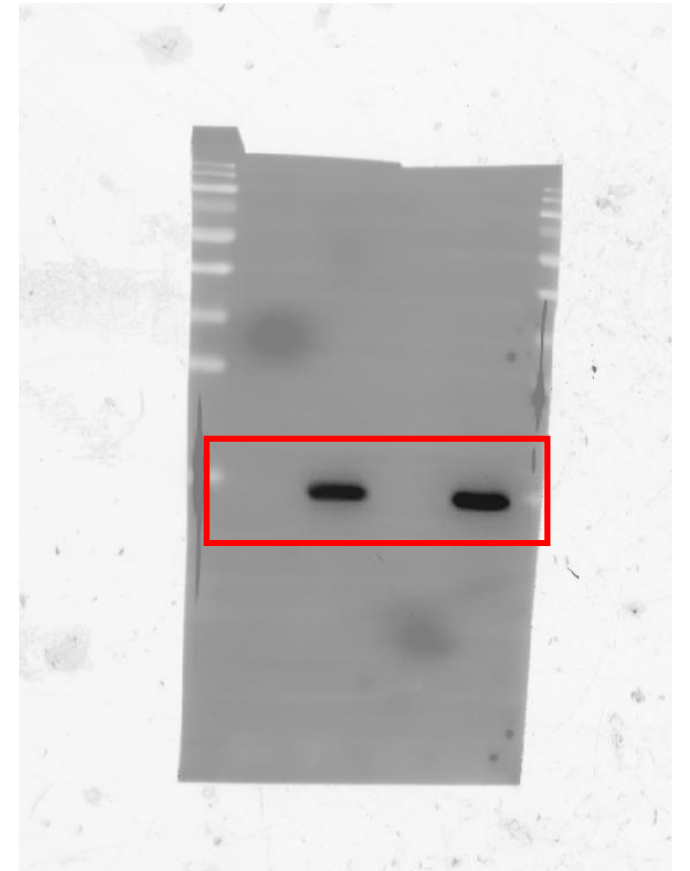



**Supplementary Figure 6B**

**YAP**

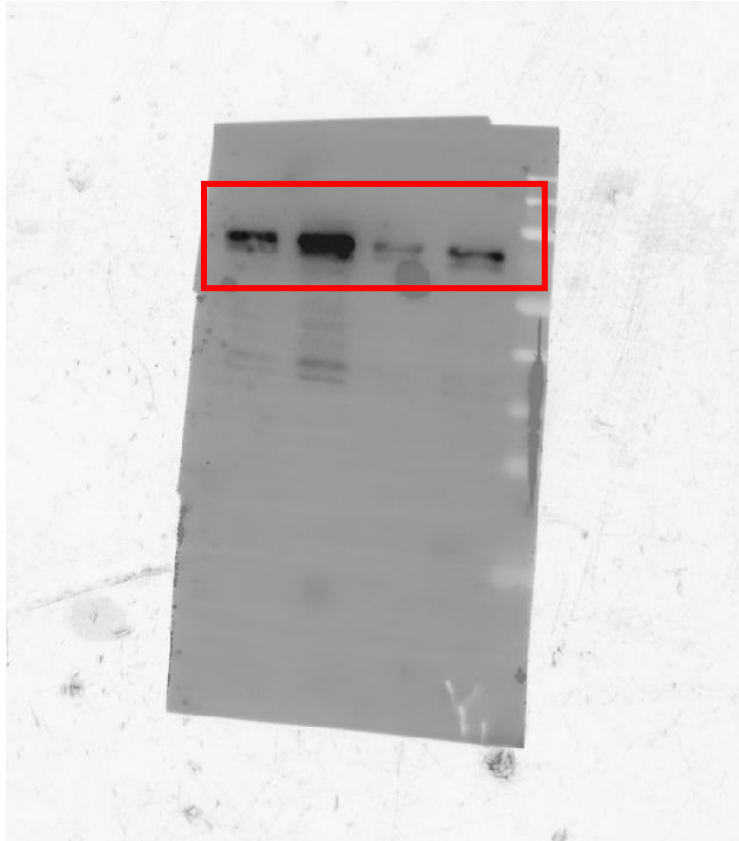

**Tubulin**

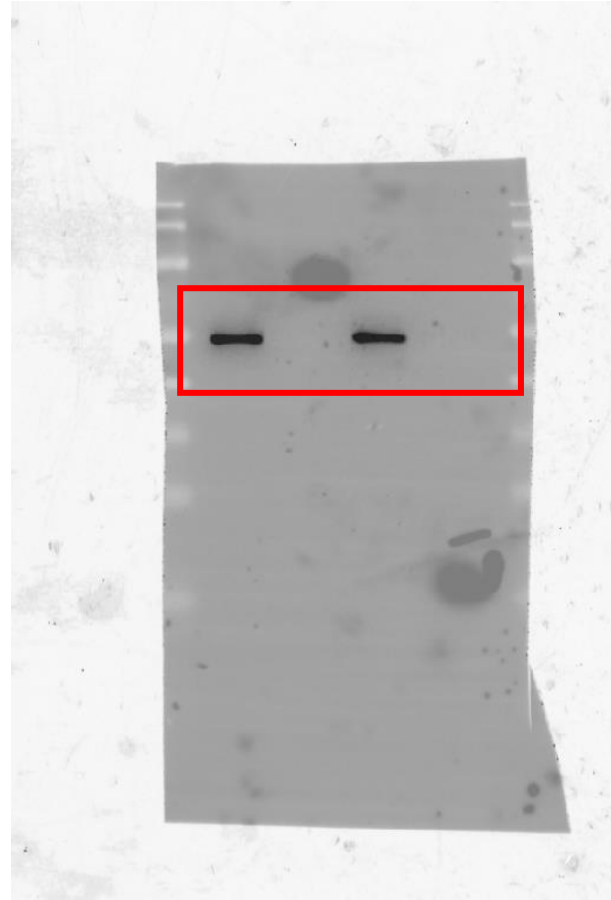

**Histone 3**

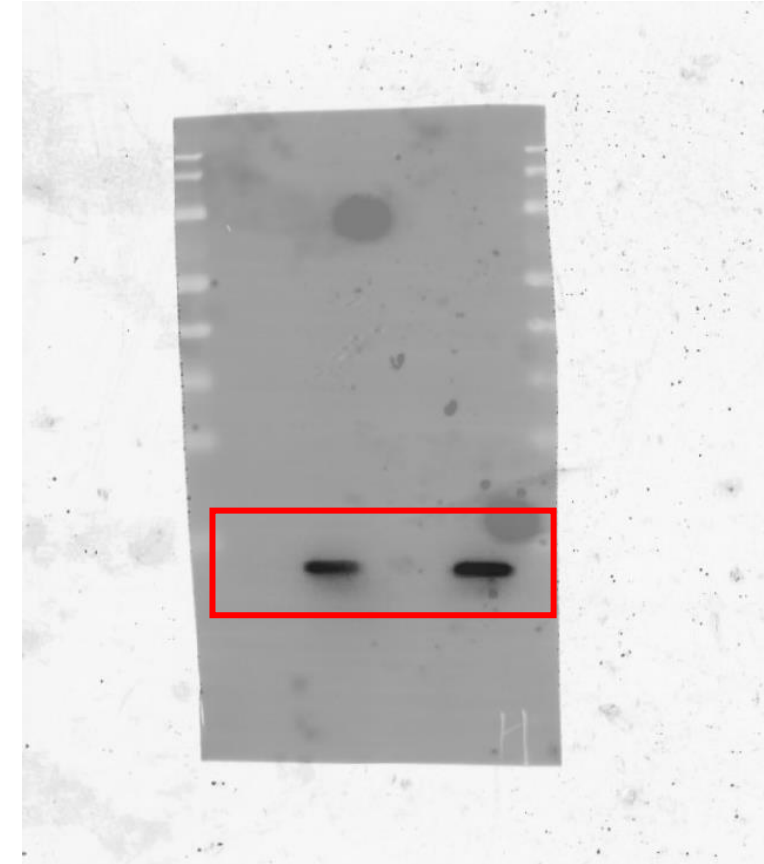

### Supplementary Figure 6D

|           | Cytoplasm |          |          | Nucleus  |          |          |
|-----------|-----------|----------|----------|----------|----------|----------|
| siControl | 0.325662  | 0.402576 | 0.390722 | 0.674338 | 0.597424 | 0.609278 |
| siJOSD1   | 0.19341   | 0.234885 | 0.225056 | 0.409035 | 0.355911 | 0.364625 |

### Supplementary Figure 6F

|           | Cytoplasm |          |          | Nucleus  |          |          |
|-----------|-----------|----------|----------|----------|----------|----------|
| siControl | 0.238654  | 0.342775 | 0.381703 | 0.761346 | 0.657225 | 0.618297 |
| siJOSD1   | 0.144761  | 0.204206 | 0.108741 | 0.452162 | 0.383461 | 0.471339 |

Supplementary Figure 6G

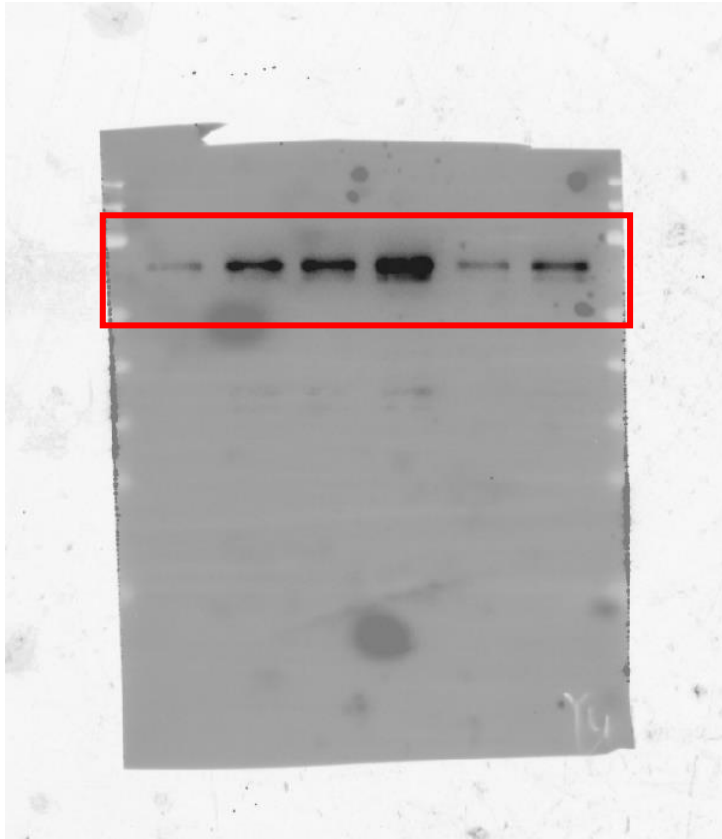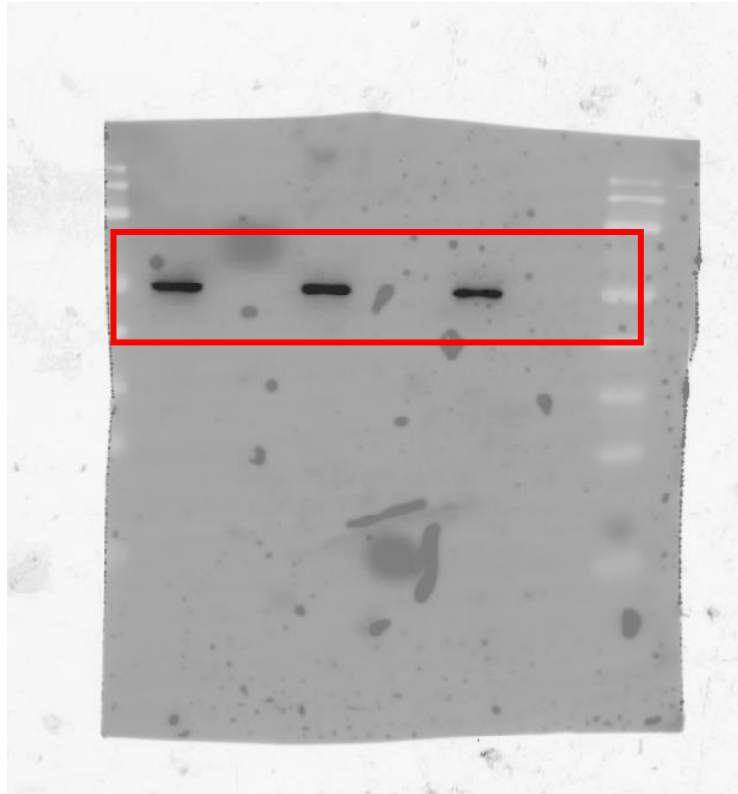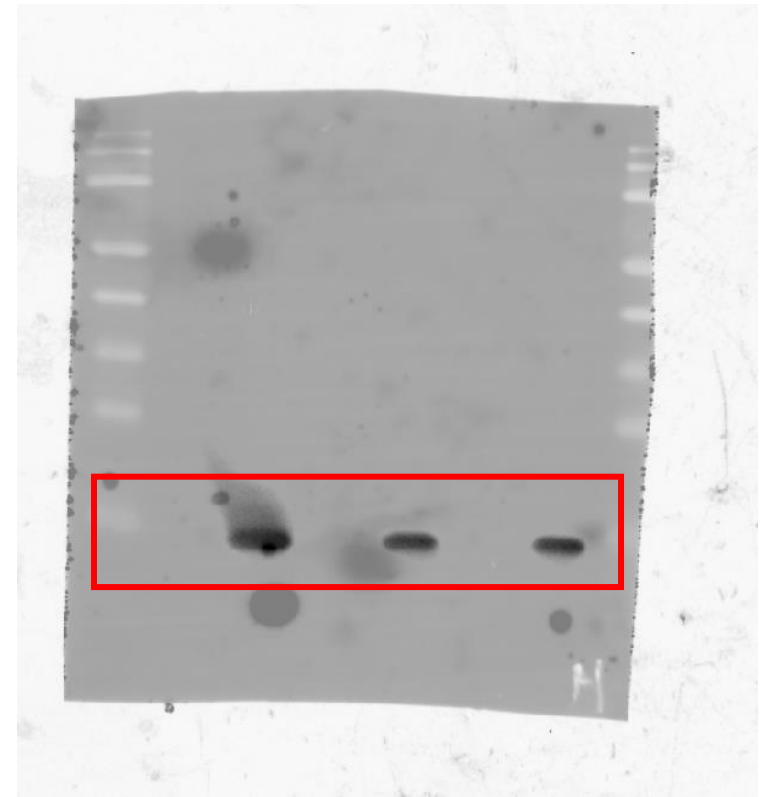

## Supplementary Figure 6l

|                                | Cytoplasm |          |          | Nucleus  |          |          |
|--------------------------------|-----------|----------|----------|----------|----------|----------|
| Flag                           | 0.240987  | 0.322065 | 0.336948 | 0.759013 | 0.677935 | 0.663052 |
| Flag-JOSD1                     | 0.960797  | 1.078805 | 1.300437 | 1.680994 | 1.412759 | 1.40832  |
| FLAG-<br>JOSD1 <sup>C36A</sup> | 0.270205  | 0.356114 | 0.312924 | 0.932599 | 0.770636 | 0.774348 |
|                                |           |          |          |          |          |          |
